# Supplementary material for: Deciphering complex brain spatiotemporal dynamics shaping diverse human behavior
Source: Research Square preprint supplement (doi:10.21203/rs.3.rs-3344208/v1), 2023-10-13
Supplement: Supplementary file 1 [file f492884db4a1aa568a27f35d.xlsx]

## Sheet: HCPYA_behavior_phenotypes   
dimension	Formal Name	assessment	fullDisplayName
Health and Family History	FamHist_Moth_Dep	Family History of Psychiatric and Neurologic Disorders	Mother Depression
	FamHist_Fath_Dep	Family History of Psychiatric and Neurologic Disorders	Father Depression
	FamHist_Fath_DrgAlc	Family History of Psychiatric and Neurologic Disorders	Father Drug or Alcohol Problems
	FamHist_Moth_None	Family History of Psychiatric and Neurologic Disorders	Mother None of the Above
	FamHist_Fath_None	Family History of Psychiatric and Neurologic Disorders	Father None of the Above
Alertness	MMSE_Score	Cognitive Status (Mini Mental Status Exam)	Mini Mental Status Exam Total Score
	PSQI_Score	Sleep (Pittsburgh Sleep Questionnaire)	Sleep (Pittsburgh Sleep Questionnaire) Total Score
	PSQI_TooCold	Sleep (Pittsburgh Sleep Questionnaire)	5f. Sleep Trouble - Feel too cold
	PSQI_TooHot	Sleep (Pittsburgh Sleep Questionnaire)	5g. Sleep Trouble - Feel too hot
	PSQI_BadDream	Sleep (Pittsburgh Sleep Questionnaire)	5h. Sleep Trouble - Had bad dreams
	PSQI_Pain	Sleep (Pittsburgh Sleep Questionnaire)	5i. Sleep Trouble - Have pain
Cognition	PicSeq_Unadj	Episodic Memory (Picture Sequence Memory)	NIH Toolbox Picture Sequence Memory Test: Unadjusted Scale Score
	CardSort_Unadj	Executive Function/Cognitive Flexibility (Dimensional Change Card Sort)	NIH Toolbox Dimensional Change Card Sort Test: Unadjusted Scale Score
	Flanker_Unadj	Executive Function/Inhibition (Flanker Task)	NIH Toolbox Flanker Inhibitory Control and Attention Test: Unadjusted Scale Score
	PMAT24_A_CR	Fluid Intelligence (Penn Progressive Matrices)	Penn Progressive Matrices: Number of Correct Responses (PMAT24_A_CR)
	PMAT24_A_SI	Fluid Intelligence (Penn Progressive Matrices)	Penn Progressive Matrices: Total Skipped Items (PMAT24_A_SI)
	PMAT24_A_RTCR	Fluid Intelligence (Penn Progressive Matrices)	Penn Progressive Matrices: Median Reaction Time for Correct Responses (PMAT24_A_RTCR)
	ReadEng_Unadj	Language/Reading Decoding (Oral Reading Recognition)	NIH Toolbox Oral Reading Recognition Test: Unadjusted Scale Score
	PicVocab_Unadj	Language/Vocabulary Comprehension (Picture Vocabulary)	NIH Toolbox Picture Vocabulary Test: Unadjusted Scale Score
	ProcSpeed_Unadj	Processing Speed (Pattern Completion Processing Speed)	NIH Toolbox Pattern Comparison Processing Speed Test: Unadjusted Scale Score
	DDisc_AUC_200	Self-regulation/Impulsivity (Delay Discounting)	Delay Discounting: Area Under the Curve for Discounting of $200 (DDisc_AUC_200)
	DDisc_AUC_40K	Self-regulation/Impulsivity (Delay Discounting)	Delay Discounting: Area Under the Curve for Discounting of $40,000 (DDisc_AUC_40K)
	VSPLOT_TC	Spatial Orientation (Variable Short Penn Line Orientation Test)	Variable Short Penn Line Orientation: Total Number Correct (VSPLOT_TC)
	VSPLOT_CRTE	Spatial Orientation (Variable Short Penn Line Orientation Test)	Variable Short Penn Line Orientation: Median Reaction Time Divided by Expected Number of Clicks for Correct (VSPLOT_CRTE)
	VSPLOT_OFF	Spatial Orientation (Variable Short Penn Line Orientation Test)	Variable Short Penn Line Orientation: Total Positions Off for All Trials (VSPLOT_OFF)
	SCPT_TPRT	Sustained Attention (Short Penn Continuous Performance Test)	Short Penn Continuous Performance Test: Median Response Time for True Positive Responses (SCPT_TPRT)
	SCPT_SEN	Sustained Attention (Short Penn Continuous Performance Test)	Short Penn Continuous Performance Test: Sensitivity = SCPT_TP/(SCPT_TP + SCPT_FN) (SCPT_SEN)
	SCPT_SPEC	Sustained Attention (Short Penn Continuous Performance Test)	Short Penn Continuous Performance Test: Specificity = SCPT_TN/(SCPT_TN + SCPT_FP) (SCPT_SPEC)
	SCPT_LRNR	Sustained Attention (Short Penn Continuous Performance Test)	Short Penn Continuous Performance Test: Longest Run of Non-Responses (SCPT_LRNR)
	IWRD_TOT	Verbal Episodic Memory (Penn Word Memory Test)	Penn Word Memory Test: Total Number of Correct Responses (IWRD_TOT)
	IWRD_RTC	Verbal Episodic Memory (Penn Word Memory Test)	Penn Word Memory Test: Median Reaction Time for Correct Responses (IWRD_RTC)
	ListSort_Unadj	Working Memory (List Sorting)	NIH Toolbox List Sorting Working Memory Test: Unadjusted Scale Score
	CogFluidComp_Unadj	Cognition Fluid Composite	NIH Toolbox Cognition Fluid Composite: Unadjusted Scale Score
	CogEarlyComp_Unadj	Cognition Early Childhood Composite	NIH Toolbox Cognition Early Childhood Composite: Unadjusted Scale Score
	CogTotalComp_Unadj	Cognition Total Composite Score	NIH Toolbox Cognition Total Composite Score: Unadjusted Scale Score
	CogCrystalComp_Unadj	Cognition Crystallized Composite	NIH Toolbox Cognition Crystallized Composite: Unadjusted Scale Score
Emotion	ER40_CR	Emotion Recognition (Penn Emotion Recognition Test)	Penn Emotion Recognition Test: Number of Correct Responses (ER40_CR)
	ER40_CRT	Emotion Recognition (Penn Emotion Recognition Test)	Penn Emotion Recognition Test: Correct Responses Median Response Time (ms) (ER40_CRT)
	ER40ANG	Emotion Recognition (Penn Emotion Recognition Test)	Penn Emotion Recognition Test: Number of Correct Anger Identifications (ER40ANG)
	ER40FEAR	Emotion Recognition (Penn Emotion Recognition Test)	Penn Emotion Recognition Test: Number of Correct Fear Identifications (ER40FEAR)
	ER40HAP	Emotion Recognition (Penn Emotion Recognition Test)	Penn Emotion Recognition Test: Number of Correct Happy Identifications (ER40HAP)
	ER40NOE	Emotion Recognition (Penn Emotion Recognition Test)	Penn Emotion Recognition Test: Number of Correct Neutral Identifications (ER40NOE)
	ER40SAD	Emotion Recognition (Penn Emotion Recognition Test)	Penn Emotion Recognition Test: Number of Correct Sad Identifications (ER40SAD)
	AngAffect_Unadj	Negative Affect (Sadness, Fear, Anger)	NIH Toolbox Anger-Affect Survey: Unadjusted Scale Score
	AngHostil_Unadj	Negative Affect (Sadness, Fear, Anger)	NIH Toolbox Anger-Hostility Survey: Unadjusted Scale Score
	AngAggr_Unadj	Negative Affect (Sadness, Fear, Anger)	NIH Toolbox Anger-Physical Aggression Survey: Unadjusted Scale Score
	FearAffect_Unadj	Negative Affect (Sadness, Fear, Anger)	NIH Toolbox Fear-Affect Survey: Unadjusted Scale Score
	FearSomat_Unadj	Negative Affect (Sadness, Fear, Anger)	NIH Toolbox Fear-Somatic Arousal Survey: Unadjusted Scale Score
	Sadness_Unadj	Negative Affect (Sadness, Fear, Anger)	NIH Toolbox Sadness Survey: Unadjusted Scale Score
	LifeSatisf_Unadj	Psychological Well-being (Positive Affect, Life Satisfaction, Meaning and Purpose)	NIH Toolbox General Life Satisfaction Survey: Unadjusted Scale Score
	MeanPurp_Unadj	Psychological Well-being (Positive Affect, Life Satisfaction, Meaning and Purpose)	NIH Toolbox Meaning and Purpose Survey: Unadjusted Scale Score
	PosAffect_Unadj	Psychological Well-being (Positive Affect, Life Satisfaction, Meaning and Purpose)	NIH Toolbox Positive Affect Survey: Unadjusted Scale Score
	Friendship_Unadj	Social Relationships (Social Support, Companionship, Social Distress, Positive Social Development)	NIH Toolbox Friendship Survey: Unadjusted Scale Score
	Loneliness_Unadj	Social Relationships (Social Support, Companionship, Social Distress, Positive Social Development)	NIH Toolbox Loneliness Survey: Unadjusted Scale Score
	PercHostil_Unadj	Social Relationships (Social Support, Companionship, Social Distress, Positive Social Development)	NIH Toolbox Perceived Hostility Survey: Unadjusted Scale Score
	PercReject_Unadj	Social Relationships (Social Support, Companionship, Social Distress, Positive Social Development)	NIH Toolbox Perceived Rejection Survey: Unadjusted Scale Score
	EmotSupp_Unadj	Social Relationships (Social Support, Companionship, Social Distress, Positive Social Development)	NIH Toolbox Emotional Support Survey: Unadjusted Scale Score
	InstruSupp_Unadj	Social Relationships (Social Support, Companionship, Social Distress, Positive Social Development)	NIH Toolbox Instrumental Support Survey: Unadjusted Scale Score
	PercStress_Unadj	Stress and Self Efficacy (Perceived Stress, Self-Efficacy)	NIH Toolbox Perceived Stress Survey: Unadjusted Scale Score
	SelfEff_Unadj	Stress and Self Efficacy (Perceived Stress, Self-Efficacy)	NIH Toolbox Self-Efficacy Survey: Unadjusted Scale Score
In-Scanner Task Performance	Emotion_Task_Acc	Emotion	OVERALL Emotion Task accuracy
	Gambling_Task_Perc_Larger	Gambling	Gambling Task Overall Percentage 'Larger'
	Gambling_Task_Perc_Smaller	Gambling	Gambling Task Overall Percentage 'Smaller'
	Language_Task_Acc	Language	Language Task OVERALL accuracy
	Relational_Task_Acc	Relational	Relational Task OVERALL accuracy
	Social_Task_Perc_TOM	Social	Social Task Overall Percentage 'TOM'
	WM_Task_Acc	Working Memory	Working Memory Task Overall Accuracy
Motor	Endurance_Unadj	Endurance (2 minute walk test)	NIH Toolbox 2-minute Walk Endurance Test : Unadjusted Scale Score
	GaitSpeed_Comp	Locomotion (4-meter walk test)	NIH Toolbox 4-Meter Walk Gait Speed Test: Computed Score
	Dexterity_Unadj	Dexterity (9-hole Pegboard)	NIH Toolbox 9-hole Pegboard Dexterity Test : Unadjusted Scale Score
	Strength_Unadj	Strength (Grip Strength Dynamometry)	NIH Toolbox Grip Strength Test: Unadjusted Scale Score
Personality	NEOFAC_A	Five Factor Model (NEO-FFI) Factor Summary Scores	NEO-FFI Agreeableness (NEOFAC_A)
	NEOFAC_O	Five Factor Model (NEO-FFI) Factor Summary Scores	NEO-FFI Openness to Experience (NEOFAC_O)
	NEOFAC_C	Five Factor Model (NEO-FFI) Factor Summary Scores	NEO-FFI Conscientiousness (NEOFAC_C)
	NEOFAC_N	Five Factor Model (NEO-FFI) Factor Summary Scores	NEO-FFI Neuroticism (NEOFAC_N)
	NEOFAC_E	Five Factor Model (NEO-FFI) Factor Summary Scores	NEO-FFI Extraversion (NEOFAC_E)
Psychiatric and Life Function	ASR_Anxd_Raw	Life Function (Achenbach Adult Self-Report, Syndrome Scales and DSM-Oriented Scale)	ASR Anxious/Depressed Raw Score (ASR_Anxd_Raw)
	ASR_Witd_Raw	Life Function (Achenbach Adult Self-Report, Syndrome Scales and DSM-Oriented Scale)	ASR Withdrawn Raw Score (ASR_Witd_Raw)
	ASR_Soma_Raw	Life Function (Achenbach Adult Self-Report, Syndrome Scales and DSM-Oriented Scale)	ASR Somatic Complaints Raw Score (ASR_Soma_Raw)
	ASR_Thot_Raw	Life Function (Achenbach Adult Self-Report, Syndrome Scales and DSM-Oriented Scale)	ASR Thought Problems Raw Score (ASR_Thot_Raw)
	ASR_Attn_Raw	Life Function (Achenbach Adult Self-Report, Syndrome Scales and DSM-Oriented Scale)	ASR Attention Problems Raw Score (ASR_Attn_Raw)
	ASR_Aggr_Raw	Life Function (Achenbach Adult Self-Report, Syndrome Scales and DSM-Oriented Scale)	ASR Aggressive Behavior Raw Score (ASR_Aggr_Raw)
	ASR_Rule_Raw	Life Function (Achenbach Adult Self-Report, Syndrome Scales and DSM-Oriented Scale)	ASR Rule Breaking Behavior Raw Score (ASR_Rule_Raw)
	ASR_Intr_Raw	Life Function (Achenbach Adult Self-Report, Syndrome Scales and DSM-Oriented Scale)	ASR Intrusive Raw Score (ASR_Intr_Raw)
	ASR_Oth_Raw	Life Function (Achenbach Adult Self-Report, Syndrome Scales and DSM-Oriented Scale)	ASR Other Problems Raw Score (ASR_Oth_Raw)
	ASR_Crit_Raw	Life Function (Achenbach Adult Self-Report, Syndrome Scales and DSM-Oriented Scale)	ASR Critical Items Raw Score (ASR_Crit_Raw)
	ASR_Intn_Raw	Life Function (Achenbach Adult Self-Report, Syndrome Scales and DSM-Oriented Scale)	ASR Internalizing Raw Score (ASR_Intn_Raw)
	ASR_Intn_T	Life Function (Achenbach Adult Self-Report, Syndrome Scales and DSM-Oriented Scale)	ASR Internalizing Gender and Age Adjusted T-score (ASR_Intn_T)
	ASR_Extn_Raw	Life Function (Achenbach Adult Self-Report, Syndrome Scales and DSM-Oriented Scale)	ASR Internalizing Gender and Age Adjusted T-score (ASR_Intn_T)
	ASR_Extn_T	Life Function (Achenbach Adult Self-Report, Syndrome Scales and DSM-Oriented Scale)	ASR Externalizing Gender and Age Adjusted T-score (ASR_Computed_Externalizing_Adjusted_T) (ASR_Extn_T)
	ASR_TAO_Sum	Life Function (Achenbach Adult Self-Report, Syndrome Scales and DSM-Oriented Scale)	ASR Sum of Thought, Attention, and Other Problems Raw Score (ASR_TAO_Sum)
	ASR_Totp_Raw	Life Function (Achenbach Adult Self-Report, Syndrome Scales and DSM-Oriented Scale)	ASR Total Problems Raw Score (ASR_Totp_Raw)
	ASR_Totp_T	Life Function (Achenbach Adult Self-Report, Syndrome Scales and DSM-Oriented Scale)	ASR Total Problems Gender and Age Adjusted T-score (ASR_Totp_T)
	DSM_Depr_Raw	Life Function (Achenbach Adult Self-Report, Syndrome Scales and DSM-Oriented Scale)	ASR DSM Depressive Problems Raw Score (DSM_Depr_Raw)
	DSM_Anxi_Raw	Life Function (Achenbach Adult Self-Report, Syndrome Scales and DSM-Oriented Scale)	ASR DSM Anxiety Problems Raw Score (DSM_Anxi_Raw)
	DSM_Somp_Raw	Life Function (Achenbach Adult Self-Report, Syndrome Scales and DSM-Oriented Scale)	ASR DSM Somatic Problems Raw Score (DSM_Somp_Raw)
	DSM_Avoid_Raw	Life Function (Achenbach Adult Self-Report, Syndrome Scales and DSM-Oriented Scale)	ASR DSM Avoidant Personality Problems Raw Score (DSM_Avoid_Raw)
	DSM_Adh_Raw	Life Function (Achenbach Adult Self-Report, Syndrome Scales and DSM-Oriented Scale)	ASR DSM AD/H Problems Raw Score (DSM_Adh_Raw)
	DSM_Inat_Raw	Life Function (Achenbach Adult Self-Report, Syndrome Scales and DSM-Oriented Scale)	ASR DSM Inattention Problems Raw Score (DSM_Inat_Raw)
	DSM_Hype_Raw	Life Function (Achenbach Adult Self-Report, Syndrome Scales and DSM-Oriented Scale)	ASR DSM Hyperactivity Problems Raw Score (DSM_Hype_Raw)
	DSM_Antis_Raw	Life Function (Achenbach Adult Self-Report, Syndrome Scales and DSM-Oriented Scale)	ASR DSM Antisocial Personality Problems Raw Score (DSM_Antis_Raw)
	SSAGA_ChildhoodConduct	Psychiatric History	Childhood Conduct Problems
	SSAGA_PanicDisorder	Psychiatric History	Panic Disorder
	SSAGA_Agoraphobia	Psychiatric History	Agoraphobia
	SSAGA_Depressive_Ep	Psychiatric History	Major Depressive Episode
	SSAGA_Depressive_Sx	Psychiatric History	Number Depressive Symptoms
Sensory	Odor_Unadj	Olfaction (Odor Identification Test)	NIH Toolbox Odor Identification Age 3+ Unadjusted Scale Score
	PainInterf_Tscore	Pain (Pain Intensity and Interference Surveys)	NIH Toolbox Pain Interference Survey Age 18+: T-score
	Taste_Unadj	Taste (Taste Intensity Test)	NIH Toolbox Regional Taste Intensity Age 12+ Unadjusted Scale Score
	EVA_Denom	Vision (EVA Scores and Farnsworth Test)	EVA score - Denominator
	Correction	Vision (EVA Scores and Farnsworth Test)	Eyeglass correction
	Mars_Log_Score	Contrast Sensitivity (Mars Contrast Sensitivity)	Mars Contrast Sensitivity Score
	Mars_Final	Contrast Sensitivity (Mars Contrast Sensitivity)	Mars Final Contrast Sensitivity Score
Substance Use	Total_Drinks_7days	Alcohol Use 7-Day Retrospective	Total drinks in past 7 days
	Num_Days_Drank_7days	Alcohol Use 7-Day Retrospective	Number days drank alcohol in past 7 days
	Avg_Weekday_Drinks_7days	Alcohol Use 7-Day Retrospective	Avg total weekday alcoholic drinks/day in past 7 days
	Avg_Weekend_Drinks_7days	Alcohol Use 7-Day Retrospective	Avg total weekend alcoholic drinks/day in past 7 days
	Total_Beer_Wine_Cooler_7days	Alcohol Use 7-Day Retrospective	Total alcoholic drinks in past 7 days (Beer/Wine Coolers)
	Avg_Weekday_Beer_Wine_Cooler_7days	Alcohol Use 7-Day Retrospective	Avg total weekday alcoholic drinks/day in past 7 days (Beer/Wine Coolers)
	Avg_Weekend_Beer_Wine_Cooler_7days	Alcohol Use 7-Day Retrospective	Avg total weekend alcoholic drinks/day in past 7 days (Beer/Wine Coolers)
	Total_Wine_7days	Alcohol Use 7-Day Retrospective	Total alcoholic drinks in past 7 days (Wine)
	Avg_Weekday_Wine_7days	Alcohol Use 7-Day Retrospective	Avg total weekday alcoholic drinks/day in past 7 days (Wine)
	Avg_Weekend_Wine_7days	Alcohol Use 7-Day Retrospective	Avg total weekend alcoholic drinks/day in past 7 days (Wine)
	Total_Hard_Liquor_7days	Alcohol Use 7-Day Retrospective	Total alcoholic drinks in past 7 days (Hard Liquor)
	Avg_Weekend_Hard_Liquor_7days	Alcohol Use 7-Day Retrospective	Avg total weekend alcoholic drinks/day in past 7 days (Hard Liquor)
	SSAGA_Alc_D4_Dp_Sx	Alcohol Use and Dependence	Number of DSM4 Alcohol Dependence Criteria Endorsed
	SSAGA_Alc_D4_Ab_Dx	Alcohol Use and Dependence	DSM4 Alcohol Abuse Criteria Met
	SSAGA_Alc_D4_Ab_Sx	Alcohol Use and Dependence	DSM4 Alcohol Abuse number of symptoms
	SSAGA_Alc_D4_Dp_Dx	Alcohol Use and Dependence	DSM4 Alcohol Dependence Criteria Met
	SSAGA_Alc_12_Drinks_Per_Day	Alcohol Use and Dependence	Drinks per drinking day in past 12 months
	SSAGA_Alc_12_Frq	Alcohol Use and Dependence	Frequency of any alcohol use in past 12 months
	SSAGA_Alc_12_Frq_5plus	Alcohol Use and Dependence	Frequency of drinking 5+ drinks in past 12 months
	SSAGA_Alc_12_Frq_Drk	Alcohol Use and Dependence	Frequency drunk in past 12 months
	SSAGA_Alc_12_Max_Drinks	Alcohol Use and Dependence	Max drinks in a single day in past 12 months
	SSAGA_Alc_Age_1st_Use	Alcohol Use and Dependence	Age at first alcohol use
	SSAGA_Alc_Hvy_Drinks_Per_Day	Alcohol Use and Dependence	Drinks per day in heaviest 12-month period
	SSAGA_Alc_Hvy_Frq	Alcohol Use and Dependence	Frequency of any alcohol use, heaviest 12-month period
	SSAGA_Alc_Hvy_Frq_5plus	Alcohol Use and Dependence	Frequency of drinking 5+ drinks heaviest 12-month period
	SSAGA_Alc_Hvy_Frq_Drk	Alcohol Use and Dependence	Frequency drunk in heaviest 12-month period
	SSAGA_Alc_Hvy_Max_Drinks	Alcohol Use and Dependence	Lifetime max drinks in single day
	Total_Any_Tobacco_7days	Tobacco Use 7-Day Retrospective	Total times used/smoked ANY TOBACCO in past 7 days
	Times_Used_Any_Tobacco_Today	Tobacco Use 7-Day Retrospective	Times used/smoked ANY TOBACCO TODAY
	Num_Days_Used_Any_Tobacco_7days	Tobacco Use 7-Day Retrospective	Number days smoked/used ANY TOBACCO in past 7 days
	Avg_Weekday_Any_Tobacco_7days	Tobacco Use 7-Day Retrospective	Avg total weekday ANY TOBACCO per day in past 7 days
	Avg_Weekend_Any_Tobacco_7days	Tobacco Use 7-Day Retrospective	Avg total weekend ANY TOBACCO per day in past 7 days
	Total_Cigarettes_7days	Tobacco Use 7-Day Retrospective	Total # CIGARETTES in past 7 days
	Avg_Weekday_Cigarettes_7days	Tobacco Use 7-Day Retrospective	Avg weekday CIGARETTES per day in past 7 days
	Avg_Weekend_Cigarettes_7days	Tobacco Use 7-Day Retrospective	Avg weekend CIGARETTES per day in past 7 days
	SSAGA_TB_Smoking_History	Tobacco Use and Dependence	Smoking history
	SSAGA_TB_Still_Smoking	Tobacco Use and Dependence	Whether age last smoked is current age
	SSAGA_Times_Used_Illicits	Illicit Drug Use	Times used illicit drugs
	SSAGA_Times_Used_Cocaine	Illicit Drug Use	Times used cocaine
	SSAGA_Times_Used_Hallucinogens	Illicit Drug Use	Times used hallucinogens
	SSAGA_Times_Used_Opiates	Illicit Drug Use	Times used opiates
	SSAGA_Times_Used_Sedatives	Illicit Drug Use	Times used sedatives
	SSAGA_Times_Used_Stimulants	Illicit Drug Use	Times used stimulants
	SSAGA_Mj_Use	Marijuana Use and Dependence	Ever used marijuana?
	SSAGA_Mj_Ab_Dep	Marijuana Use and Dependence	DSM Marijuana Dependence
	SSAGA_Mj_Times_Used	Marijuana Use and Dependence	Times used marijuana

## Sheet: HCPYA_behavior_pattern_ext
variable name	absolute values of spearman correlation coefficient	spearman correlation coefficient	p value	Display Name	behavior dimension
Strength_Unadj	0.777378	0.777378	1.39e-157	Grip Strength	Motor
SSAGA_Alc_Hvy_Max_Drinks	0.438169	0.438169	1.19e-37	Alcoholic (Hvy_Max_Drinks)	Substance Use
SSAGA_Alc_12_Max_Drinks	0.347453	0.347453	2.22e-23	Alcoholic (12_Max_Drinks)	Substance Use
SSAGA_Alc_12_Drinks_Per_Day	0.313999	0.313999	3.59e-19	Alcoholic (12_Drinks_Per_Day)	Substance Use
VSPLOT_OFF	0.31324	-0.31324	4.41e-19	Spatial orientation (OFF)	Cognition
Total_Beer_Wine_Cooler_7days	0.312004	0.312004	6.16e-19	Beer Wine Cooler (Total/7days)	Substance Use
SSAGA_Alc_Hvy_Drinks_Per_Day	0.289554	0.289554	2.05e-16	Alcoholic (Hvy_Drinks_Per_Day)	Substance Use
Endurance_Unadj	0.282833	0.282833	1.06e-15	Endurance	Motor
SSAGA_Alc_12_Frq_5plus	0.27644	-0.27644	4.82e-15	Alcoholic (12_Frq_5plus)	Substance Use
Avg_Weekday_Beer_Wine_Cooler_7days	0.272085	0.272085	1.33e-14	Beer Wine Cooler (Avg_weekday_7days)	Substance Use
AngAggr_Unadj	0.253803	0.253803	7.65e-13	Anger-Physical Aggression	Emotion
SSAGA_Alc_Hvy_Frq_5plus	0.252192	-0.252192	1.08e-12	Alcoholic (Hvy_Frq_5plus)	Substance Use
VSPLOT_TC	0.240986	0.240986	1.09e-11	Spatial orientation (TC)	Cognition
ASR_Rule_Raw	0.240828	0.240828	1.13e-11	Rule Breaking Behavior	Psychiatric and Life Function
Avg_Weekend_Beer_Wine_Cooler_7days	0.238294	0.238294	1.87e-11	Beer Wine Cooler (Avg_weekend_7days)	Substance Use
SSAGA_ChildhoodConduct	0.237784	0.237784	2.07e-11	Childhood Conduct	Psychiatric and Life Function
CogCrystalComp_Unadj	0.232554	0.232554	5.78e-11	Cognition Crystallized	Cognition
Language_Task_Acc	0.229794	0.229794	9.83e-11	Language (Task_Acc)	In-Scanner Task Performance
ReadEng_Unadj	0.228694	0.228694	1.21e-10	Reading Decoding (PicVocab)	Cognition
Dexterity_Unadj	0.221426	-0.221426	4.73e-10	Dexterity	Motor
SelfEff_Unadj	0.214246	0.214246	1.73e-09	Self Efficacy	Emotion
PMAT24_A_SI	0.205534	-0.205534	7.9e-09	Fluid intelligence (SI)	Cognition
PMAT24_A_CR	0.205411	0.205411	8.07e-09	Fluid intelligence (CR)	Cognition
PMAT24_A_RTCR	0.202942	0.202942	1.22e-08	Fluid intelligence (RTCR)	Cognition
NEOFAC_A	0.199987	-0.199987	2e-08	Agreeableness	Personality
PicVocab_Unadj	0.190783	0.190783	8.88e-08	Vocabulary Comprehension (PicVocab)	Cognition
Avg_Weekday_Any_Tobacco_7days	0.189622	0.189622	1.07e-07	Tobacco use (Avg_weekday)	Substance Use
Total_Drinks_7days	0.187724	0.187724	1.43e-07	Total Drinks (7days)	Substance Use
DSM_Antis_Raw	0.184502	0.184502	2.35e-07	ASR DSM Antisocial Personality	Psychiatric and Life Function
SSAGA_Alc_D4_Ab_Sx	0.184032	0.184032	2.53e-07	DSM4 Alcohol Abuse	Substance Use
Num_Days_Used_Any_Tobacco_7days	0.181339	0.181339	3.79e-07	Tobacco use (Num_Days)	Substance Use
Total_Any_Tobacco_7days	0.181168	0.181168	3.89e-07	Tobacco use (Total)	Substance Use
PicSeq_Unadj	0.179545	-0.179545	4.96e-07	Episodic Memory (PicSeq)	Cognition
SSAGA_Mj_Ab_Dep	0.177606	0.177606	6.6e-07	Marijuana Use (DSM)	Substance Use
FearAffect_Unadj	0.177303	-0.177303	6.9e-07	Fear-Affect	Emotion
ASR_Witd_Raw	0.177106	0.177106	7.1e-07	ASR Withdrawn	Psychiatric and Life Function
CogTotalComp_Unadj	0.175522	0.175522	8.95e-07	NIH Cognition Total Composite	Cognition
Taste_Unadj	0.173952	-0.173952	1.12e-06	NIH Regional Taste Intensity	Sensory
WM_Task_Acc	0.168579	0.168579	2.4e-06	Working Memory Task Overall Accuracy	In-Scanner Task Performance
ASR_Extn_Raw	0.168403	0.168403	2.46e-06	ASR Internalizing	Psychiatric and Life Function
SSAGA_Times_Used_Hallucinogens	0.167361	0.167361	2.85e-06	Times used hallucinogens	Substance Use
ListSort_Unadj	0.167089	0.167089	2.95e-06	NIH Toolbox List Sorting Working Memory Test: Unadjusted Scale Score	Cognition
Avg_Weekday_Wine_7days	0.166808	-0.166808	3.07e-06	Avg total weekday alcoholic drinks/day in past 7 days (Wine)	Substance Use
DSM_Anxi_Raw	0.166537	-0.166537	3.19e-06	ASR DSM Anxiety Problems Raw Score (DSM_Anxi_Raw)	Psychiatric and Life Function
Total_Wine_7days	0.166221	-0.166221	3.33e-06	Total alcoholic drinks in past 7 days (Wine)	Substance Use
SSAGA_Times_Used_Opiates	0.163623	0.163623	4.75e-06	Times used opiates	Substance Use
SSAGA_Alc_12_Frq	0.159658	-0.159658	8.07e-06	Frequency of any alcohol use in past 12 months	Substance Use
Flanker_Unadj	0.157271	0.157271	1.1e-05	NIH Toolbox Flanker Inhibitory Control and Attention Test: Unadjusted Scale Score	Cognition
SSAGA_Alc_12_Frq_Drk	0.154783	-0.154783	1.52e-05	Frequency drunk in past 12 months	Substance Use
SSAGA_Times_Used_Illicits	0.154182	0.154182	1.64e-05	Times used illicit drugs	Substance Use
Social_Task_Perc_TOM	0.154085	0.154085	1.67e-05	Social Task Overall Percentage 'TOM'	In-Scanner Task Performance
SSAGA_Alc_D4_Dp_Sx	0.15397	0.15397	1.69e-05	Number of DSM4 Alcohol Dependence Criteria Endorsed	Substance Use
Avg_Weekend_Any_Tobacco_7days	0.150011	0.150011	2.78e-05	Avg total weekend ANY TOBACCO per day in past 7 days	Substance Use
SSAGA_Alc_Hvy_Frq	0.149639	-0.149639	2.92e-05	Frequency of any alcohol use, heaviest 12-month period	Substance Use
SSAGA_TB_Smoking_History	0.148805	0.148805	3.23e-05	Smoking history	Substance Use
ASR_Extn_T	0.148227	0.148227	3.47e-05	ASR Externalizing Gender and Age Adjusted T-score (ASR_Computed_Externalizing_Adjusted_T) (ASR_Extn_T)	Psychiatric and Life Function
SCPT_SEN	0.142029	0.142029	7.34e-05	Short Penn Continuous Performance Test: Sensitivity = SCPT_TP/(SCPT_TP + SCPT_FN) (SCPT_SEN)	Cognition
Avg_Weekday_Drinks_7days	0.140065	0.140065	9.24e-05	Avg total weekday alcoholic drinks/day in past 7 days	Substance Use
Avg_Weekend_Drinks_7days	0.137787	0.137787	0.000120305	Avg total weekend alcoholic drinks/day in past 7 days	Substance Use
NEOFAC_O	0.136897	0.136897	0.000133221	NEO-FFI Openness to Experience (NEOFAC_O)	Personality
NEOFAC_N	0.136457	-0.136457	0.000140067	NEO-FFI Neuroticism (NEOFAC_N)	Personality
SSAGA_Alc_D4_Ab_Dx	0.132182	0.132182	0.000226317	DSM4 Alcohol Abuse Criteria Met	Substance Use
ASR_Crit_Raw	0.130845	0.130845	0.000262188	ASR Critical Items Raw Score (ASR_Crit_Raw)	Psychiatric and Life Function
SSAGA_Mj_Times_Used	0.130603	0.130603	0.00026925	Times used marijuana	Substance Use
SSAGA_Alc_Hvy_Frq_Drk	0.123813	-0.123813	0.000555822	Frequency drunk in heaviest 12-month period	Substance Use
CardSort_Unadj	0.122965	0.122965	0.000606963	NIH Toolbox Dimensional Change Card Sort Test: Unadjusted Scale Score	Cognition
SSAGA_Alc_D4_Dp_Dx	0.122509	0.122509	0.000636275	DSM4 Alcohol Dependence Criteria Met	Substance Use
NEOFAC_C	0.120511	-0.120511	0.000780725	NEO-FFI Conscientiousness (NEOFAC_C)	Personality
EmotSupp_Unadj	0.120074	-0.120074	0.000816053	NIH Toolbox Emotional Support Survey: Unadjusted Scale Score	Emotion
Avg_Weekend_Wine_7days	0.116439	-0.116439	0.00117347	Avg total weekend alcoholic drinks/day in past 7 days (Wine)	Substance Use
SCPT_LRNR	0.116129	-0.116129	0.00120982	Short Penn Continuous Performance Test: Longest Run of Non-Responses (SCPT_LRNR)	Cognition
SSAGA_Times_Used_Stimulants	0.114613	0.114613	0.00140308	Times used stimulants	Substance Use
ASR_Totp_T	0.111864	0.111864	0.00182763	ASR Total Problems Gender and Age Adjusted T-score (ASR_Totp_T)	Psychiatric and Life Function
SSAGA_Times_Used_Cocaine	0.11108	0.11108	0.00196861	Times used cocaine	Substance Use
Num_Days_Drank_7days	0.109564	0.109564	0.00226992	Number days drank alcohol in past 7 days	Substance Use
FamHist_Moth_Dep	0.108037	-0.108037	0.00261548	Mother Depression	Health and Family History
FamHist_Moth_None	0.107843	0.107843	0.00266285	Mother None of the Above	Health and Family History
Avg_Weekday_Cigarettes_7days	0.107434	0.107434	0.00276492	Avg weekday CIGARETTES per day in past 7 days	Substance Use
ER40_CRT	0.1059	0.1059	0.00318007	Penn Emotion Recognition Test: Correct Responses Median Response Time (ms) (ER40_CRT)	Emotion
PainInterf_Tscore	0.102843	0.102843	0.00418109	NIH Toolbox Pain Interference Survey Age 18+: T-score	Sensory
PercHostil_Unadj	0.100332	0.100332	0.0052081	NIH Toolbox Perceived Hostility Survey: Unadjusted Scale Score	Emotion
ASR_Intr_Raw	0.100325	0.100325	0.00521147	ASR Intrusive Raw Score (ASR_Intr_Raw)	Psychiatric and Life Function
DSM_Somp_Raw	0.0990862	-0.0990862	0.00579783	ASR DSM Somatic Problems Raw Score (DSM_Somp_Raw)	Psychiatric and Life Function
ASR_Oth_Raw	0.0988071	0.0988071	0.00593794	ASR Other Problems Raw Score (ASR_Oth_Raw)	Psychiatric and Life Function
Correction	0.0971266	0.0971266	0.00684743	Eyeglass correction	Sensory
Total_Cigarettes_7days	0.096669	0.096669	0.00711588	Total # CIGARETTES in past 7 days	Substance Use
DSM_Hype_Raw	0.0965733	0.0965733	0.00717315	ASR DSM Hyperactivity Problems Raw Score (DSM_Hype_Raw)	Psychiatric and Life Function
SSAGA_Depressive_Sx	0.0963515	-0.0963515	0.00730756	Number Depressive Symptoms	Psychiatric and Life Function
DSM_Adh_Raw	0.095615	0.095615	0.00777027	ASR DSM AD/H Problems Raw Score (DSM_Adh_Raw)	Psychiatric and Life Function
SSAGA_Agoraphobia	0.0937275	-0.0937275	0.00907778	Agoraphobia	Psychiatric and Life Function
ASR_TAO_Sum	0.0931337	0.0931337	0.00952789	ASR Sum of Thought, Attention, and Other Problems Raw Score (ASR_TAO_Sum)	Psychiatric and Life Function
MeanPurp_Unadj	0.0884375	-0.0884375	0.0138453	NIH Toolbox Meaning and Purpose Survey: Unadjusted Scale Score	Emotion
SCPT_SPEC	0.0843169	-0.0843169	0.0189681	Short Penn Continuous Performance Test: Specificity = SCPT_TN/(SCPT_TN + SCPT_FP) (SCPT_SPEC)	Cognition
CogEarlyComp_Unadj	0.0841805	0.0841805	0.0191628	NIH Toolbox Cognition Early Childhood Composite: Unadjusted Scale Score	Cognition
ASR_Anxd_Raw	0.0821646	-0.0821646	0.0222507	ASR Anxious/Depressed Raw Score (ASR_Anxd_Raw)	Psychiatric and Life Function
VSPLOT_CRTE	0.0812603	-0.0812603	0.0237705	Variable Short Penn Line Orientation: Median Reaction Time Divided by Expected Number of Clicks for Correct (VSPLOT_CRTE)	Cognition
ASR_Totp_Raw	0.0808289	0.0808289	0.0245269	ASR Total Problems Raw Score (ASR_Totp_Raw)	Psychiatric and Life Function
Gambling_Task_Perc_Larger	0.0791972	-0.0791972	0.0275782	Gambling Task Overall Percentage 'Larger'	In-Scanner Task Performance
Gambling_Task_Perc_Smaller	0.0791972	0.0791972	0.0275782	Gambling Task Overall Percentage 'Smaller'	In-Scanner Task Performance
Times_Used_Any_Tobacco_Today	0.0790056	0.0790056	0.0279572	Times used/smoked ANY TOBACCO TODAY	Substance Use
ASR_Soma_Raw	0.0779469	-0.0779469	0.0301324	ASR Somatic Complaints Raw Score (ASR_Soma_Raw)	Psychiatric and Life Function
Avg_Weekend_Cigarettes_7days	0.0761959	0.0761959	0.0340491	Avg weekend CIGARETTES per day in past 7 days	Substance Use
ASR_Attn_Raw	0.0755918	0.0755918	0.0354973	ASR Attention Problems Raw Score (ASR_Attn_Raw)	Psychiatric and Life Function
ER40HAP	0.0740145	-0.0740145	0.0395285	Penn Emotion Recognition Test: Number of Correct Happy Identifications (ER40HAP)	Emotion
SSAGA_TB_Still_Smoking	0.0735263	0.0735263	0.0408521	Whether age last smoked is current age	Substance Use
PercStress_Unadj	0.0734962	-0.0734962	0.0409349	NIH Toolbox Perceived Stress Survey: Unadjusted Scale Score	Emotion

## Sheet: HCPYA_behavior_pattern_cog
variable name	absolute values of spearman correlation coefficient	spearman correlation coefficient	p value	Display Name	behavior dimension
PicVocab_Unadj	0.43545	0.43545	3.72e-37	Vocabulary Comprehension (PicVocab)	Cognition
CogTotalComp_Unadj	0.427176	0.427176	1.12e-35	Cognition Total Composite	Cognition
CogCrystalComp_Unadj	0.407128	0.407128	2.92e-32	Cognition Crystallized Composite	Cognition
CogEarlyComp_Unadj	0.404353	0.404353	8.32e-32	Cognition Early Childhood Composite	Cognition
Relational_Task_Acc	0.403943	0.403943	9.7e-32	Relational(Task_Acc)	In-Scanner Task Performance
VSPLOT_OFF	0.392442	-0.392442	6.67e-30	Spatial Orientation (OFF)	Cognition
VSPLOT_TC	0.382748	0.382748	2.08e-28	Spatial Orientation (TC)	Cognition
DDisc_AUC_40K	0.354403	0.354403	2.54e-24	Self-regulation/Impulsivity (DDisc_AUC_40K)	Cognition
DDisc_AUC_200	0.333519	0.333519	1.45e-21	Self-regulation/Impulsivity (DDisc_AUC_200)	Cognition
ReadEng_Unadj	0.32482	0.32482	1.78e-20	Reading Decoding (ReadEng)	Cognition
PMAT24_A_CR	0.323419	0.323419	2.64e-20	Fluid Intelligence (CR)	Cognition
Language_Task_Acc	0.323132	0.323132	2.87e-20	Language (Task_Acc)	In-Scanner Task Performance
CogFluidComp_Unadj	0.302506	0.302506	7.65e-18	Cognition Fluid Composite	Cognition
WM_Task_Acc	0.295475	0.295475	4.65e-17	Working Memory (Task_Acc)	In-Scanner Task Performance
PMAT24_A_SI	0.292137	-0.292137	1.08e-16	Fluid Intelligence (SI)	Cognition
PicSeq_Unadj	0.275461	0.275461	6.06e-15	Episodic Memory (PicSeq)	Cognition
LifeSatisf_Unadj	0.246296	0.246296	3.69e-12	Psychological Well-being (LifeSatisf)	Emotion
NEOFAC_C	0.245958	-0.245958	3.96e-12	Conscientiousness	Personality
FamHist_Fath_DrgAlc	0.23905	-0.23905	1.61e-11	Father Drug or Alcohol Problems	Health and Family History
ListSort_Unadj	0.238274	0.238274	1.88e-11	Working Memory (ListSort)	Cognition
EVA_Denom	0.192989	-0.192989	6.25e-08	Vision (EVA Denom)	Sensory
MMSE_Score	0.192212	0.192212	7.08e-08	Cognitive Status (MMSE)	Alertness
SSAGA_Alc_12_Max_Drinks	0.187003	0.187003	1.6e-07	Alcoholic (12_Max_Drinks)	Substance Use
SSAGA_Mj_Times_Used	0.177143	-0.177143	7.06e-07	Marijuana Use (Times)	Substance Use
Endurance_Unadj	0.166345	0.166345	3.27e-06	Endurance	Motor
SSAGA_Alc_12_Frq_Drk	0.16617	-0.16617	3.35e-06	Alcoholic (12_Frq_5plus)	Substance Use
FearSomat_Unadj	0.165837	0.165837	3.51e-06	Negative Affect (FearSomat)	Emotion
PercStress_Unadj	0.165039	-0.165039	3.92e-06	Perceived Stress	Emotion
Flanker_Unadj	0.163241	0.163241	5e-06	Executive Function/Inhibition (Flanker)	Cognition
SSAGA_Mj_Use	0.162045	-0.162045	5.87e-06	Marijuana Use (Ever_used)	Substance Use
CardSort_Unadj	0.160823	0.160823	6.91e-06	Cognitive Flexibility (CardSort)	Cognition
ER40ANG	0.159122	0.159122	8.66e-06	Emotion Recognition (Anger)	Emotion
PSQI_TooCold	0.146381	-0.146381	4.35e-05	Sleep (PSQI_TooCold)	Alertness
PMAT24_A_RTCR	0.144159	0.144159	5.69e-05	Fluid Intelligence (Penn Progressive Matrices)	Cognition
ASR_Attn_Raw	0.142809	0.142809	6.69e-05	Life Function (Achenbach Adult Self-Report, Syndrome Scales and DSM-Oriented Scale)	Psychiatric and Life Function
DSM_Inat_Raw	0.142589	0.142589	6.87e-05	Life Function (Achenbach Adult Self-Report, Syndrome Scales and DSM-Oriented Scale)	Psychiatric and Life Function
GaitSpeed_Comp	0.142588	0.142588	6.87e-05	Locomotion (4-meter walk test)	Motor
ASR_Rule_Raw	0.142186	-0.142186	7.2e-05	Life Function (Achenbach Adult Self-Report, Syndrome Scales and DSM-Oriented Scale)	Psychiatric and Life Function
SCPT_SPEC	0.141524	0.141524	7.79e-05	Sustained Attention (Short Penn Continuous Performance Test)	Cognition
PainInterf_Tscore	0.140754	0.140754	8.52e-05	Pain (Pain Intensity and Interference Surveys)	Sensory
FamHist_Fath_None	0.140718	0.140718	8.56e-05	Family History of Psychiatric and Neurologic Disorders	Health and Family History
InstruSupp_Unadj	0.139216	0.139216	0.000101997	Social Relationships (Social Support, Companionship, Social Distress, Positive Social Development)	Emotion
ER40_CR	0.13479	0.13479	0.000169168	Emotion Recognition (Penn Emotion Recognition Test)	Emotion
NEOFAC_E	0.132711	-0.132711	0.000213434	Five Factor Model (NEO-FFI) Factor Summary Scores	Personality
Total_Beer_Wine_Cooler_7days	0.131277	0.131277	0.000250061	Alcohol Use 7-Day Retrospective	Substance Use
PSQI_Score	0.131139	-0.131139	0.000253891	Sleep (Pittsburgh Sleep Questionnaire)	Alertness
ProcSpeed_Unadj	0.130551	0.130551	0.000270769	Processing Speed (Pattern Completion Processing Speed)	Cognition
DSM_Adh_Raw	0.130424	0.130424	0.000274552	Life Function (Achenbach Adult Self-Report, Syndrome Scales and DSM-Oriented Scale)	Psychiatric and Life Function
ER40FEAR	0.127779	0.127779	0.000365541	Emotion Recognition (Penn Emotion Recognition Test)	Emotion
Emotion_Task_Acc	0.125003	0.125003	0.000490756	Emotion	In-Scanner Task Performance
PSQI_TooHot	0.118559	-0.118559	0.000950633	Sleep (Pittsburgh Sleep Questionnaire)	Alertness
Avg_Weekday_Beer_Wine_Cooler_7days	0.118273	0.118273	0.00097826	Alcohol Use 7-Day Retrospective	Substance Use
Avg_Weekend_Beer_Wine_Cooler_7days	0.115243	0.115243	0.00131959	Alcohol Use 7-Day Retrospective	Substance Use
SCPT_TPRT	0.114658	0.114658	0.00139697	Sustained Attention (Short Penn Continuous Performance Test)	Cognition
Avg_Weekend_Hard_Liquor_7days	0.113136	-0.113136	0.00161841	Alcohol Use 7-Day Retrospective	Substance Use
SSAGA_Alc_12_Frq	0.111933	-0.111933	0.0018157	Alcohol Use and Dependence	Substance Use
ASR_Thot_Raw	0.107095	-0.107095	0.0028522	Life Function (Achenbach Adult Self-Report, Syndrome Scales and DSM-Oriented Scale)	Psychiatric and Life Function
Avg_Weekday_Cigarettes_7days	0.106419	-0.106419	0.00303366	Tobacco Use 7-Day Retrospective	Substance Use
DSM_Avoid_Raw	0.104018	0.104018	0.0037668	Life Function (Achenbach Adult Self-Report, Syndrome Scales and DSM-Oriented Scale)	Psychiatric and Life Function
ER40SAD	0.10385	0.10385	0.00382373	Emotion Recognition (Penn Emotion Recognition Test)	Emotion
SSAGA_Alc_Hvy_Max_Drinks	0.103599	0.103599	0.0039101	Alcohol Use and Dependence	Substance Use
SCPT_SEN	0.102831	0.102831	0.00418571	Sustained Attention (Short Penn Continuous Performance Test)	Cognition
EmotSupp_Unadj	0.101175	0.101175	0.00484038	Social Relationships (Social Support, Companionship, Social Distress, Positive Social Development)	Emotion
Total_Hard_Liquor_7days	0.0948921	-0.0948921	0.00824968	Alcohol Use 7-Day Retrospective	Substance Use
Avg_Weekday_Drinks_7days	0.0946594	0.0946594	0.00840959	Alcohol Use 7-Day Retrospective	Substance Use
NEOFAC_A	0.093892	0.093892	0.00895651	Five Factor Model (NEO-FFI) Factor Summary Scores	Personality
SSAGA_Mj_Ab_Dep	0.0931243	-0.0931243	0.00953514	Marijuana Use and Dependence	Substance Use
Avg_Weekday_Wine_7days	0.0919989	0.0919989	0.0104436	Alcohol Use 7-Day Retrospective	Substance Use
Dexterity_Unadj	0.0896377	0.0896377	0.0126031	Dexterity (9-hole Pegboard)	Motor
Total_Cigarettes_7days	0.0891424	-0.0891424	0.0131033	Tobacco Use 7-Day Retrospective	Substance Use
Avg_Weekday_Any_Tobacco_7days	0.0885731	-0.0885731	0.0136997	Tobacco Use 7-Day Retrospective	Substance Use
PercReject_Unadj	0.0885162	-0.0885162	0.0137606	Social Relationships (Social Support, Companionship, Social Distress, Positive Social Development)	Emotion
ASR_Intr_Raw	0.0885059	0.0885059	0.0137716	Life Function (Achenbach Adult Self-Report, Syndrome Scales and DSM-Oriented Scale)	Psychiatric and Life Function
SSAGA_Alc_12_Frq_5plus	0.0845208	-0.0845208	0.0186803	Alcohol Use and Dependence	Substance Use
Num_Days_Used_Any_Tobacco_7days	0.081116	-0.081116	0.0240212	Tobacco Use 7-Day Retrospective	Substance Use
IWRD_TOT	0.0803315	0.0803315	0.0254245	Verbal Episodic Memory (Penn Word Memory Test)	Cognition
SSAGA_Alc_Hvy_Drinks_Per_Day	0.0802747	-0.0802747	0.0255288	Alcohol Use and Dependence	Substance Use
SSAGA_Alc_Hvy_Frq	0.0798456	-0.0798456	0.0263286	Alcohol Use and Dependence	Substance Use
Avg_Weekend_Cigarettes_7days	0.0779499	-0.0779499	0.0301262	Tobacco Use 7-Day Retrospective	Substance Use
Total_Any_Tobacco_7days	0.0773213	-0.0773213	0.0314849	Tobacco Use 7-Day Retrospective	Substance Use
Num_Days_Drank_7days	0.0769177	0.0769177	0.0323849	Alcohol Use 7-Day Retrospective	Substance Use
SSAGA_Alc_Hvy_Frq_Drk	0.0766597	-0.0766597	0.0329714	Alcohol Use and Dependence	Substance Use
DSM_Depr_Raw	0.0763865	0.0763865	0.0336025	Life Function (Achenbach Adult Self-Report, Syndrome Scales and DSM-Oriented Scale)	Psychiatric and Life Function
DSM_Antis_Raw	0.0749578	-0.0749578	0.0370736	Life Function (Achenbach Adult Self-Report, Syndrome Scales and DSM-Oriented Scale)	Psychiatric and Life Function
DSM_Anxi_Raw	0.0739536	-0.0739536	0.0396915	Life Function (Achenbach Adult Self-Report, Syndrome Scales and DSM-Oriented Scale)	Psychiatric and Life Function
SSAGA_PanicDisorder	0.0707767	0.0707767	0.0490274	Psychiatric History	Psychiatric and Life Function

## Sheet: HCPD_behavior_phenotypes
Dimension	Assessment	behavior scales	variablie name in the study	nda structure	nda elements	nda scource	nda description
Cognitive Measures	Cognitive Status	Montreal Cognitive Assessment (MoCA)	mmse01-alt_tot	mmse01	alt_tot	teen/child	Sum of 3B. Spelling Backwards Test. Ask the subject to spell the word "WORLD" backwards. Record each response. Use the instructions to determine which are correct responses, and check one box at right for each correct response. Sum of correct (Maximum Score = 5).
			mmse01-att_calc_tot	mmse01	att_calc_tot	teen/child	Sum of 3A. ATTENTION AND CALCULATION Counting Backwards Test. Ask the subject to begin with 100 and count backwards by 7. Record each response. Check one box at right for each correct response. Any response 7 or less than the previous response is a correct response. The score is the number of correct subtractions. Sum of correct (Maximum Score = 5).
	Executive Function/Cognitive Flexibility	Dimensional Change Card Sort Test	dccs01-DimChangeCardSort-nih_dccs_unadjusted	dccs01	nih_dccs_unadjusted	NIH Toolbox Ipad App	Uncorrected standard score for DCCS Instrument (Inst) specified
	Executive Function/Inhibition	Flanker Inhibitory Control and Attention Test	flanker01-Flanker_IC_Attn-nih_flanker_unadjusted	flanker01	nih_flanker_unadjusted	NIH Toolbox Ipad App	Uncorrected Standard score for Flanker Instrument (Inst) specified
	Fluid Intelligence	Wechsler Adult Intelligence Scale (WAIS–IV; ages 17-21)	wais_iv_part101-matrix_completion	wais_iv_part101	matrix_completion	qint	WAIS-IV Matrix Reasoning Completion time (seconds)
			wais_iv_part101-scoring_matrixreasoning_raw	wais_iv_part101	scoring_matrixreasoning_raw	qint	WAIS-IV Matrix Reasoning Raw Score
		Wechsler Intelligence Scale for Children (WISC-V; ages 6-16)	wisc_v01-matrix_completion	wisc_v01	matrix_completion	qint	WISC-V Matrix Reasoning Completion Time (seconds)
	Language Experience and Proficiency	Language Experience and Proficiency Questionnaire (LEAP-Q)	leap01-caregiver-lan_know	leap01	lan_know	teen/parent	How many languages does your child know?
			leap01-caregiver-lan3err	leap01	lan3err	teen/parent	Total Exposure Percantage (internal variable for checking whether percentages add up to 100)
			leap01-self-lan_know	leap01	lan_know	teen/parent	How many languages does your child know?
	Language/Reading Decoding	Oral Reading Recognition Test (ages 5+)	orrt01-OraReadRecg-tbx_reading_score	orrt01	tbx_reading_score	NIH Toolbox Ipad App	Uncorrected Standard score for the Oral Reading Recognition Test Instrument (Inst) specified
	NIH Toolbox-Cognition Composite	NIH Toolbox-Cognition Composite	cogcomp01-nih_crycogcomp_unadjusted	cogcomp01	nih_crycogcomp_unadjusted	NIH Toolbox Ipad App	Crystal Cognition Composite Score unadjusted
			cogcomp01-nih_eccogcomp_unadjusted	cogcomp01	nih_eccogcomp_unadjusted	NIH Toolbox Ipad App	Early Child Cognition Composite Score unadjusted
			cogcomp01-nih_fluidcogcomp_unadjusted	cogcomp01	nih_fluidcogcomp_unadjusted	NIH Toolbox Ipad App	Fluid Cognition Composite Score unadjusted
			cogcomp01-nih_totalcogcomp_unadjusted	cogcomp01	nih_totalcogcomp_unadjusted	NIH Toolbox Ipad App	Total Cognition Composite Score unadjusted
	Processing Speed	Pattern Comparison Processing Speed Test (ages 5+)	pcps01-PattCompProc-nih_patterncomp_unadjusted	pcps01	nih_patterncomp_unadjusted	NIH Toolbox Ipad App	Uncorrected Standard score for the Pattern Comparison Processing Speed Instrument (Inst) specified
	Self-regulation/Impulsivity	Delay Discounting (ages 5+)	deldisk01-PennCNP-auc_200	deldisk01	auc_200	PennCNP	Area Under the Curve for Delay Amount $200
			deldisk01-PennCNP-auc_40000	deldisk01	auc_40000	PennCNP	Area Under the Curve for Delay Amount $40000
	Working Memory	List Sorting Working Memory Test (ages 5+)	lswmt01-ListSort_WM-uss	lswmt01	uss	NIH Toolbox Ipad App	List Sorting Working Memory Test Uncorrected Standard Score for Instrument(Inst) specified
Emotion Measures	Behavioral Inhibition and Activation	Behavioral Inhibition/Behavioral Approach System (BIS/BAS; ages 5-21)	bisbas01-caregiver-bas_drive	bisbas01	bas_drive	teen/child	BAS Drive: teen/child report
			bisbas01-caregiver-bas_fs	bisbas01	bas_fs	child	BAS Fun seeking: child report
			bisbas01-caregiver-bas_rr	bisbas01	bas_rr	child	BAS Reward Responsiveness: child report
			bisbas01-caregiver-bas_total	bisbas01	bas_total	parent	BAS Total Score: parent report
			bisbas01-caregiver-bissc_total	bisbas01	bissc_total	child	BIS Total Score: child report
			bisbas01-self-bas_drive	bisbas01	bas_drive	teen/child	BAS Drive: teen/child report
			bisbas01-self-bas_fs	bisbas01	bas_fs	child	BAS Fun seeking: child report
			bisbas01-self-bas_rr	bisbas01	bas_rr	child	BAS Reward Responsiveness: child report
			bisbas01-self-bis_y_ss_basm_drive	bisbas01	bis_y_ss_basm_drive	child	BAS drive (modified): bisbas13 + bisbas14 + bisbas15 + bisbas16 Validation: All items must be answered: child report
			bisbas01-self-bis_y_ss_basm_rr	bisbas01	bis_y_ss_basm_rr	child	BAS Reward Responsiveness (modified): bisbas8 + bisbas9 + bisbas11 + bisbas12 Validation: All items must be answered: child report
			bisbas01-self-bis_y_ss_bism_sum	bisbas01	bis_y_ss_bism_sum	child	BIS Sum (modified): bisbas2 + bisbas3 + bisbas4 + bisbas6 Validation: All items must be answered: child report
			bisbas01-self-bissc_total	bisbas01	bissc_total	child	BIS Total Score: child report
	Emotion Recognition	Penn Emotion Recognition Test (ER40; ages 8+)	er4001-er40_c_ang	er4001	er40_c_ang	PennCNP	ER40 Correct Anger Identifications
			er4001-er40_c_cr	er4001	er40_c_cr	PennCNP	ER40 Correct Responses
			er4001-er40_c_fcrt	er4001	er40_c_fcrt	PennCNP	ER40 Correct Female Identifications Median Response Time (ms)
			er4001-er40_c_fear	er4001	er40_c_fear	PennCNP	ER40 Correct Fear Identifications
			er4001-er40_c_fpa	er4001	er40_c_fpa	PennCNP	ER40 False Positive Anger Responses
			er4001-er40_c_fpart	er4001	er40_c_fpart	PennCNP	Median Response Time for ER40 False Positive Anger Responses (ms)
			er4001-er40_c_fpf	er4001	er40_c_fpf	PennCNP	ER40 False Positive Fear Responses
			er4001-er40_c_fpfrt	er4001	er40_c_fpfrt	PennCNP	Median Response Time for ER40 False Positive Fear Responses (ms)
			er4001-er40_c_fph	er4001	er40_c_fph	PennCNP	ER40 False Positive Happy Responses
			er4001-er40_c_fphrt	er4001	er40_c_fphrt	PennCNP	Median Response Time for ER40 False Positive Happy Responses (ms)
			er4001-er40_c_fpn	er4001	er40_c_fpn	PennCNP	ER40 False Positive No Emotion Responses
			er4001-er40_c_fpnrt	er4001	er40_c_fpnrt	PennCNP	Median Response Time for ER40 False Positive No Emotion Responses (ms)
			er4001-er40_c_fps	er4001	er40_c_fps	PennCNP	ER40 False Positive Sad Responses
			er4001-er40_c_fpsrt	er4001	er40_c_fpsrt	PennCNP	Median Response Time for ER40 False Positive Sad Responses (ms)
			er4001-er40_c_hap	er4001	er40_c_hap	PennCNP	ER40 Correct Happy Identifications
			er4001-er40_c_mcrt	er4001	er40_c_mcrt	PennCNP	ER40 Correct Male Identifications Median Response Time (ms)
			er4001-er40_c_noe	er4001	er40_c_noe	PennCNP	ER40 Correct No Emotion Identifications
			er4001-er40_c_rtcr	er4001	er40_c_rtcr	PennCNP	ER40 Correct Responses Median Response Time (ms)
			er4001-er40_c_sad	er4001	er40_c_sad	PennCNP	ER40 Correct Sad Identifications
			er4001-er40_d_angrt	er4001	er40_d_angrt	PennCNP	Median Response Time for ER40 Correct Anger Identifications (ms)
			er4001-er40_d_fc	er4001	er40_d_fc	PennCNP	ER40 Correct Female Identifications
			er4001-er40_d_fearrt	er4001	er40_d_fearrt	PennCNP	Median Response Time for ER40 Correct Fear Identifications (ms)
			er4001-er40_d_haprt	er4001	er40_d_haprt	PennCNP	Median Response Time for ER40 Correct Happy Identifications (ms)
			er4001-er40_d_mc	er4001	er40_d_mc	PennCNP	ER40 Correct Male Identifications
			er4001-er40_d_noert	er4001	er40_d_noert	PennCNP	Median Response Time for ER40 Correct No Emotion Identifications (ms)
			er4001-er40_d_sadrt	er4001	er40_d_sadrt	PennCNP	Median Response Time for ER40 Correct Sad Identifications (ms)
	Impulsivity	UPPS-P Impulsive Behavior Scale (ages 5-21)	upps01-caregiver-premed_score	upps01	premed_score	parent	Lack of Premeditation
			upps01-caregiver-senseek_score	upps01	senseek_score	parent	Sensation seeking
			upps01-caregiver-upps_negu	upps01	upps_negu	parent	Negative urgency
			upps01-caregiver-upps_posu	upps01	upps_posu	parent	Positive urgency
			upps01-self-premed_score	upps01	premed_score	parent	Lack of Premeditation
			upps01-self-senseek_score	upps01	senseek_score	parent	Sensation seeking
			upps01-self-upps_negu	upps01	upps_negu	parent	Negative urgency
			upps01-self-upps_plan	upps01	upps_plan	teen/child	Lack of Planning Short Form:
			upps01-self-upps_posu	upps01	upps_posu	parent	Positive urgency
	Negative Emotions Anger	Anger-Affect Survey (ages 18+ and parents)	prang01-AngAff-anger_rs	prang01	anger_rs	NIH Toolbox Ipad App	Raw Score for Instrument (Inst) specified
		Anger Survey (ages 5 - 17)	prang01-Anger_parent-anger_rs	prang01	anger_rs	NIH Toolbox Ipad App	Raw Score for Instrument (Inst) specified
			prang01-Anger-anger_rs	prang01	anger_rs	NIH Toolbox Ipad App	Raw Score for Instrument (Inst) specified
		Anger-Hostility Survey (ages 18+ and parents)	prang01-AngHost-anger_rs	prang01	anger_rs	NIH Toolbox Ipad App	Raw Score for Instrument (Inst) specified
		Anger-Physical Aggression Survey(ages 18+ and parents)	prang01-AngPhysAgg-anger_rs	prang01	anger_rs	NIH Toolbox Ipad App	Raw Score for Instrument (Inst) specified
	Negative Emotions Fear	Fear-Affect Survey (ages 18+ and parents)	preda01-FearAff-anx_rs	preda01	anx_rs	NIH Toolbox Ipad App	Raw Score for Instrument (Inst) specified, e.g. NIH Toolbox Fear-Affect CAT Age 18+ v2.0 or NIH Toolbox Fear-Somatic Arousal FF Age 18+ v2.0
		Fear-Over Anxious Survey (ages 5-7)	preda01-FearSoAsal-anx_rs	preda01	anx_rs	NIH Toolbox Ipad App	Raw Score for Instrument (Inst) specified, e.g. NIH Toolbox Fear-Affect CAT Age 18+ v2.0 or NIH Toolbox Fear-Somatic Arousal FF Age 18+ v2.0
		Fear Survey (ages 8-17)	tlbx_fearanx01-Fear_parent-nih_tlbx_rawscore	tlbx_fearanx01	nih_tlbx_rawscore	NIH Toolbox Ipad App	Raw Score for the Instrument (Inst) Specified
			tlbx_fearanx01-Fear-nih_tlbx_rawscore	tlbx_fearanx01	nih_tlbx_rawscore	NIH Toolbox Ipad App	Raw Score for the Instrument (Inst) Specified
	Negative Emotions Sadness	Sadness Survey (ages 5+ and parents)	predd01-edd_rs	predd01	edd_rs	NIH Toolbox Ipad App	Raw Score for the Sadness CAT Instrument (Inst) Specified
			tlbx_sadness01-Sadness_parent-nih_tlbx_rawscore	tlbx_sadness01	nih_tlbx_rawscore	NIH Toolbox Ipad App	Raw Score for the Sadness Instrument (Inst) Specified
	Personality	NEO-FFI Short Form (ages 16+)	nffi01-neo2_score_ag	nffi01	neo2_score_ag	teen/child	Agreeableness (A): See REDCap calculation in hcp_choices_calcs column 4,9r,14r,19,24r,29r,34,39r,44r,49,54r,59r
			nffi01-neo2_score_co	nffi01	neo2_score_co	teen/child	Conscientiousness (C): See REDCap calculation in hcp_choices_calcs column 5,10,15r,20,25,30r,35,40,45r,50,55r,60
			nffi01-neo2_score_ex	nffi01	neo2_score_ex	teen/child	Extraversion (E): See REDCap calculation in hcp_choices_calcs column 7,12r,17,22,27r,32,37,42r,47,52,57r
			nffi01-neo2_score_ne	nffi01	neo2_score_ne	teen/child	Neuroticism (N): See REDCap calculation in hcp_choices_calcs column 1r,6,11,16r,21,26,31r,36,41,46r,51,56
			nffi01-neo2_score_op	nffi01	neo2_score_op	teen/child	Openness to Experience (O): See REDCap calculation in hcp_choices_calcs column 3r,8r,13,18r,23r,28,33r,38r,43,48r,53,58
	Positive Emotions Life Satisfaction	General Life Satisfaction Survey (ages 5+ and parents)	tlbx_wellbeing01-GenLifeSatisf_CAT-nih_tlbx_rawscore	tlbx_wellbeing01	nih_tlbx_rawscore	NIH Toolbox Ipad App	Raw Score for the Instrument (Inst) Specified
			tlbx_wellbeing01-GenLifeSatisf_FF-nih_tlbx_rawscore	tlbx_wellbeing01	nih_tlbx_rawscore	NIH Toolbox Ipad App	Raw Score for the Instrument (Inst) Specified
			tlbx_wellbeing01-GenLifeSatisf_parent-nih_tlbx_rawscore	tlbx_wellbeing01	nih_tlbx_rawscore	NIH Toolbox Ipad App	Raw Score for the Instrument (Inst) Specified
	Positive Emotions Meaning and Purpose	Meaning and Purpose Survey (ages 18+ and parents)	tlbx_wellbeing01-MeanPurpose-nih_tlbx_rawscore	tlbx_wellbeing01	nih_tlbx_rawscore	NIH Toolbox Ipad App	Raw Score for the Instrument (Inst) Specified
	Temperament and Risk-taking Behavior	Early Adolescent Temperament Questionnaire – Revised (EATQ-R; ages 9-17)	eatq01-caregiver-eatq_p_ss_activation	eatq01	eatq_p_ss_activation	parent	[parent report] Activation sum(eatq_phenx_finish_p, eatq_phenx_deal_p, eatq_phenx_before_hw_p, eatq_phenx_right_away_p, eatq_phenx_finish_hw_p, eatq_phenx_early_start_p, eatq_phenx_puts_off_p) Validation: Maximum of 1 item missing. See REDCap calculation in hcp_choices_calcs column
			eatq01-caregiver-eatq_p_ss_affiliation	eatq01	eatq_p_ss_affiliation	parent	[parent report] Affiliation sum(eatq_phenx_care_p, eatq_phenx_share_p, eatq_phenx_spend_time_p, eatq_phenx_hugs_p, eatq_phenx_close_rel_p, eatq_phenx_friendly_p) Validation: Maximum of 1 item missing. See REDCap calculation in hcp_choices_calcs column
			eatq01-caregiver-eatq_p_ss_aggression	eatq01	eatq_p_ss_aggression	parent	[parent report] Aggression sum(eatq_phenx_insult_p, eatq_phenx_angry_hit_p, eatq_phenx_rude_p, eatq_phenx_blame_p, eatq_phenx_doorslam_p, eatq_phenx_makes_fun_p, eatq_phenx_no_criticize_p) Validation: Maximum of 1 item missing. See REDCap calculation in hcp_choices_calcs column
			eatq01-caregiver-eatq_p_ss_attention	eatq01	eatq_p_ss_attention	parent	[parent report] Attention sum(eatq_phenx_concentrate_p, eatq_phenx_distracted_p, eatq_phenx_try_focus_p, eatq_phenx_peripheral_p, eatq_phenx_sidetracked_p, eatq_phenx_close_attention_p) Validation: Maximum of 1 item missing. See REDCap calculation in hcp_choices_calcs column
			eatq01-caregiver-eatq_p_ss_contl_sup	eatq01	eatq_p_ss_contl_sup	parent	[parent report] Super Scale Effortful Control Sum Score mean(eatq_p_ss_attention, eatq_p_ss_inhibitory,eatq_p_ss_activation) Validation: All three scores calculated. See REDCap calculation in hcp_choices_calcs column
			eatq01-caregiver-eatq_p_ss_depressive	eatq01	eatq_p_ss_depressive	parent	[parent report] Depressive Mood sum(eatq_phenx_enjoy_p, eatq_phenx_cry_p, eatq_phenx_sad_p, eatq_phenx_hardly_sad_p, eatq_phenx_seems_sad_p) Validation: Maximum of 1 item missing. See REDCap calculation in hcp_choices_calcs column
			eatq01-caregiver-eatq_p_ss_fear	eatq01	eatq_p_ss_fear	parent	[parent report] Fear sum(eatq_phenx_trouble_p, eatq_phenx_attachment_p, eatq_phenx_ball_scared_p, eatq_phenx_dark_scared_p, eatq_phenx_alone_p, eatq_phenx_worry_p) Validation: Maximum of 1 item missing. See REDCap calculation in hcp_choices_calcs column
			eatq01-caregiver-eatq_p_ss_frustration	eatq01	eatq_p_ss_frustration	parent	[parent report] Frustration sum(eatq_phenx_annoyed_p, eatq_phenx_irritated_crit_p, eatq_phenx_irritated_place_p, eatq_phenx_irritated_enjoy_p, eatq_phenx_disagree_p, eatq_phenx_frustrated_p) Validation: Maximum of 1 item missing. See REDCap calculation in hcp_choices_calcs column
			eatq01-caregiver-eatq_p_ss_inhibitory	eatq01	eatq_p_ss_inhibitory	parent	[parent report] Inhibitory sum(eatq_phenx_turn_taking_p, eatq_phenx_open_present_p, eatq_phenx_impulse_p, eatq_phenx_laugh_control_p, eatq_phenx_stick_to_plan_p) Validation: Maximum of 1 item missing. See REDCap calculation in hcp_choices_calcs column
			eatq01-caregiver-eatq_p_ss_negaffect_sup	eatq01	eatq_p_ss_negaffect_sup	parent	[parent report] Super Scale Negative Affect mean(eatq_p_ss_frustration, eatq_p_ss_depressive_mood, eatq_p_ss_aggression) Validation: All three scores calculated. See REDCap calculation in hcp_choices_calcs column
			eatq01-caregiver-eatq_p_ss_shyness	eatq01	eatq_p_ss_shyness	parent	[parent report] Shyness sum(eatq_phenx_social_p, eatq_phenx_is_shy_p, eatq_phenx_not_shy_p, eatq_phenx_meet_p, eatq_phenx_shy_meet_p) Validation: Maximum of 1 item missing. See REDCap calculation in hcp_choices_calcs column
			eatq01-caregiver-eatq_p_ss_surgency	eatq01	eatq_p_ss_surgency	parent	[parent report] Surgency sum(eatq_phenx_africa_p, eatq_phenx_ski_slope_p, eatq_phenx_city_move_p, eatq_phenx_sea_dive_p, eatq_phenx_travel_p, eatq_phenx_race_car_p, eatq_phenx_school_excite_p, eatq_phenx_energized_p, eatq_phenx_rides_scared_p) Validation: Maximum of 1 item missing. See REDCap calculation in hcp_choices_calcs column
			eatq01-caregiver-eatq_p_ss_surgency_sup	eatq01	eatq_p_ss_surgency_sup	parent	[parent report] Super Scale Surgency Sum Score mean(eatq_p_ss_surgency, fear (reverse scored), shyness (reverse scored)) Validation: All three scores calculated. See REDCap calculation in hcp_choices_calcs column
			eatq01-self-eatq_ac	eatq01	eatq_ac	child	[child report] Activation Control, N=5, Alpha=.76, correlation w/long form=.96 7R, 18R, 30, 39, 49R. See REDCap calculation in hcp_choices_calcs column
			eatq01-self-eatq_aff	eatq01	eatq_aff	child	[child report] Affiliation, N=5, Alpha=.75, correlation w/long form=.95 17, 27, 31, 44, 54. See REDCap calculation in hcp_choices_calcs column
			eatq01-self-eatq_agg	eatq01	eatq_agg	child	[child report] Aggression, N=6, Alpha=.80, correlation w/long form=.91 5, 9, 13, 22, 50, 58. See REDCap calculation in hcp_choices_calcs column
			eatq01-self-eatq_att	eatq01	eatq_att	child	[child report] Attention, N=6, Alpha=.67, correlation w/long form=.97 1, 34R, 38R, 41, 59, 61R. See REDCap calculation in hcp_choices_calcs column
			eatq01-self-eatq_dm	eatq01	eatq_dm	child	[child report] Depressive Mood, N=6, Alpha=.69, original long form scale 2R, 11, 20, 29, 37, 55. See REDCap calculation in hcp_choices_calcs column
			eatq01-self-eatq_fear	eatq01	eatq_fear	child	[child report] Fear, N=6, Alpha=.65, original long form scale 32, 35, 40, 46, 51, 57. See REDCap calculation in hcp_choices_calcs column
			eatq01-self-eatq_fru	eatq01	eatq_fru	child	[child report] Frustration, N=7, Alpha=.70, correlation w/long form=.95 35, 36, 47, 56, 60, 62, 64. See REDCap calculation in hcp_choices_calcs column
			eatq01-self-eatq_ic	eatq01	eatq_ic	child	[child report] Inhibitory Control, N=5, Alpha=.69, correlation w/long form=.93 10R, 14, 26R, 43, 63 . See REDCap calculation in hcp_choices_calcs column
			eatq01-self-eatq_shy	eatq01	eatq_shy	child	[child report] Shyness, N=4, Alpha=.82, correlation w/long form=.94 8, 15, 45, 53R. See REDCap calculation in hcp_choices_calcs column
			eatq01-self-eatq_ypers	eatq01	eatq_ypers	child	[child report] Perceptual Sensitivity, N=4, Alpha=.71, correlation w/long form=.90 6, 12, 21, 24. See REDCap calculation in hcp_choices_calcs column
			eatq01-self-eatq_ypls	eatq01	eatq_ypls	child	[child report] Pleasure Sensitivity, N=5, Alpha=.78, correlation w/long form=.96 4, 16, 23, 33, 65. See REDCap calculation in hcp_choices_calcs column
			eatq01-self-eatq_yspr_aff	eatq01	eatq_yspr_aff	child	[child report] Superscales/factors - d) Affiliativeness: Affiliation, Perceptual Sensitivity, Pleasure Sensitivity. See REDCap calculation in hcp_choices_calcs column
			eatq01-self-eatq_yspr_eff	eatq01	eatq_yspr_eff	child	[child report] Superscales/factors - a) Effortful Control = Attention, Inhibitory Control, Activation Control. See REDCap calculation in hcp_choices_calcs column
			eatq01-self-eatq_yspr_neg	eatq01	eatq_yspr_neg	child	[child report] Superscales/factors - c) Negative Affect = Frustration, Depressive Mood, Aggression. See REDCap calculation in hcp_choices_calcs column
			eatq01-self-eatq_yspr_sur	eatq01	eatq_yspr_sur	child	[child report] Superscales/factors - b) Surgency = High Intensity Pleasure, Fear (reverse scored), Shyness (reverse scored). See REDCap calculation in hcp_choices_calcs column
			eatq01-self-eatq_ysur	eatq01	eatq_ysur	child	[child report] Surgency, N=6, Alpha=.71, correlation w/long form=.94 3, 19R, 28R, 42, 48, 52. See REDCap calculation in hcp_choices_calcs column
		Strengths and Difficulties Questionnaire (SDQ; ages 5-12)	sdq01-p_c_sdq_co_rs	sdq01	p_c_sdq_co_rs	parent	SDQ Scores: Conduct Raw: See REDCap calculation in hcp_choices_calcs column
			sdq01-p_c_sdq_em_rs	sdq01	p_c_sdq_em_rs	parent	SDQ Scores: Emotional Raw: See REDCap calculation in hcp_choices_calcs column
			sdq01-p_c_sdq_hy_rs	sdq01	p_c_sdq_hy_rs	parent	SDQ Scores: Hyperactivity Raw: See REDCap calculation in hcp_choices_calcs column
			sdq01-p_c_sdq_pe_rs	sdq01	p_c_sdq_pe_rs	parent	SDQ Scores: Peer Raw: See REDCap calculation in hcp_choices_calcs column
			sdq01-p_c_sdq_px_rs	sdq01	p_c_sdq_px_rs	parent	SDQ Scores: Total difficulties score: This is generated by summing scores from all the scales except the prosocial scale. See REDCap calculation in hcp_choices_calcs column
			sdq01-p_c_sdq_so_rs	sdq01	p_c_sdq_so_rs	parent	SDQ Scores: Prosocial Raw: See REDCap calculation in hcp_choices_calcs column
			sdq01-sdq_pt_externalizing	sdq01	sdq_pt_externalizing	parent	Externalising Score ranges from 0 to 20 and is the sum of the conduct and hyperactivity scales.
			sdq01-sdq_pt_internalizing	sdq01	sdq_pt_internalizing	parent	Internalising Score ranges from 0 to 20 and is the sum of the emotional and peer problems scales
	Positive Emotions Positive Affect	Positive Affect Survey (ages 5+ and parents)	tlbx_wellbeing01-PosAff_CAT-nih_tlbx_rawscore	tlbx_wellbeing01	nih_tlbx_rawscore	NIH Toolbox Ipad App	Raw Score for the Instrument (Inst) Specified
			tlbx_wellbeing01-PosAff_CAT-tlbxpa_rs	tlbx_wellbeing01	tlbxpa_rs	NIH Toolbox Ipad App	Raw Score for the Instrument (Inst) Specified
			tlbx_wellbeing01-PosAff_FF-nih_tlbx_rawscore	tlbx_wellbeing01	nih_tlbx_rawscore	NIH Toolbox Ipad App	Raw Score for the Instrument (Inst) Specified
			tlbx_wellbeing01-PosAff_FF-tlbxpa_rs	tlbx_wellbeing01	tlbxpa_rs	NIH Toolbox Ipad App	Raw Score for the Instrument (Inst) Specified
			tlbx_wellbeing01-PosAff_parent-nih_tlbx_rawscore	tlbx_wellbeing01	nih_tlbx_rawscore	NIH Toolbox Ipad App	Raw Score for the Instrument (Inst) Specified
			tlbx_wellbeing01-PosAff_parent-tlbxpa_rs	tlbx_wellbeing01	tlbxpa_rs	NIH Toolbox Ipad App	Raw Score for the Instrument (Inst) Specified
		Psychological Well-being	tlbx_wellbeing01-PsyWellBeing_parent-nih_tlbx_rawscore	tlbx_wellbeing01	nih_tlbx_rawscore	NIH Toolbox Ipad App	Raw Score for the Instrument (Inst) Specified
Experiential and Behavioral Measures	Companionship	Loneliness Survey (ages 8+ and parents)	prsi01-Loneliness-soil_rs	prsi01	soil_rs	NIH Toolbox Ipad App	Raw Score for the Lonliness FF Instrument (Inst) Specified
			psm01-PicSeqMemo-nih_picseq_unadjusted	psm01	nih_picseq_unadjusted	NIH Toolbox Ipad App	Uncorrected Standard score for the Picture Sequence Memory Test Instrument (Inst) specified
			psqi01-psqi_total	psqi01	psqi_total	teen	Global PSQI Score: Add the seven component scores together:
			psqi01-psqip2	psqi01	psqip2	teen	2. During the past month, how long has it usually taken you to fall asleep each night? NUMBER OF MINUTES:________
			psqi01-psqip4	psqi01	psqip4	teen	4. During the past month, how many hours of actual sleep did you get at night? (This may be different than the number of hours you spend in bed.) HOURS OF SLEEP PER NIGHT:________
			psqi01-psqip6a_1	psqi01	psqip6a_1	teen	5. During the past month, how often have you had trouble sleeping because you: (a) Cannot get to sleep within 30 minutes: 1= Not during the past month ; 2= Less than once a week ; 3= Once or twice a week ; 4= Three or more times a week
			psqi01-psqip6a_2	psqi01	psqip6a_2	teen	5. During the past month, how often have you had trouble sleeping because you:(b) Wake up in the middle of the night or early morning: 1= Not during the past month ; 2= Less than once a week ; 3= Once or twice a week ; 4= Three or more times a week
			psqi01-psqip6a_3	psqi01	psqip6a_3	teen	5. During the past month, how often have you had trouble sleeping because you:(c) Have to get up to use the bathroom: 1= Not during the past month ; 2= Less than once a week ; 3= Once or twice a week ; 4= Three or more times a week
			psqi01-psqip6a_4	psqi01	psqip6a_4	teen	5. During the past month, how often have you had trouble sleeping because you:(d) Cannot breathe comfortably: 1= Not during the past month ; 2= Less than once a week ; 3= Once or twice a week ; 4= Three or more times a week
			psqi01-psqip6a_5	psqi01	psqip6a_5	teen	5. During the past month, how often have you had trouble sleeping because you:(e) Cough or snore loudly: 1= Not during the past month ; 2= Less than once a week ; 3= Once or twice a week ; 4= Three or more times a week
			psqi01-psqip6b_1	psqi01	psqip6b_1	teen	5. During the past month, how often have you had trouble sleeping because you:(f) Feel too cold: 1= Not during the past month ; 2= Less than once a week ; 3= Once or twice a week ; 4= Three or more times a week
			psqi01-psqip6b_2	psqi01	psqip6b_2	teen	5. During the past month, how often have you had trouble sleeping because you:(g) Feel too hot: 1= Not during the past month ; 2= Less than once a week ; 3= Once or twice a week ; 4= Three or more times a week
			psqi01-psqip6b_3	psqi01	psqip6b_3	teen	5. During the past month, how often have you had trouble sleeping because you:(h) Had bad dreams: 1= Not during the past month ; 2= Less than once a week ; 3= Once or twice a week ; 4= Three or more times a week
			psqi01-psqip6b_4	psqi01	psqip6b_4	teen	5. During the past month, how often have you had trouble sleeping because you:(i) Have pain: 1= Not during the past month ; 2= Less than once a week ; 3= Once or twice a week ; 4= Three or more times a week
			psqi01-psqpi7_1	psqi01	psqpi7_1	teen	7. During the past month, how often have you taken medicine (prescribed or 'over the counter') to help you sleep? 1= Not during the past month ; 2= Less than once a week ; 3= Once or twice a week ; 4= Three or more times a week
			psqi01-psqpi7_2	psqi01	psqpi7_2	teen	8. During the past month, how often have you had trouble staying awake while driving, eating meals, or engaging in social activity? 1= Not during the past month ; 2= Less than once a week ; 3= Once or twice a week ; 4= Three or more times a week
			psqi01-psqpi8	psqi01	psqpi8	teen	6. During the past month, how would you rate your sleep quality overall? 1= Very good ; 2= Fairly good ; 3= Fairly bad ; 4= Very bad
		Positive Peer Interaction Survey (ages 5-12)	tlbx_socwit01-PosPeerInter_parent-nih_tlbx_rawscore	tlbx_socwit01	nih_tlbx_rawscore	NIH Toolbox Ipad App	Raw Score for the Instrument (Inst) Specified
		Social Withdrawal Survey (ages 5-12)	tlbx_socwit01-SocWitd_parent-nih_tlbx_rawscore	tlbx_socwit01	nih_tlbx_rawscore	NIH Toolbox Ipad App	Raw Score for the Instrument (Inst) Specified
	Friendships and Social Support	Friendship Survey (ages 8+ and parents)	tlbx_friend01-Friendship-nih_tlbx_rawscore	tlbx_friend01	nih_tlbx_rawscore	NIH Toolbox Ipad App	Raw Score for the Friendship Instrument (Inst) Specified
			tlbx_friend01-Friendship-responsetime	tlbx_friend01	responsetime	NIH Toolbox Ipad App	timespan between item presented and the response selected (please refer to instruments scores documentation)
	NIH Toolbox Perceived Stress	Perceived Stress Survey (ages 8+ and parents)	pss01-PercStress_parent-pss_distress_rs	pss01	pss_distress_rs	NIH Toolbox Ipad App	Raw Score for the Perceived Stress Instrument (Inst) Specified
			pss01-PercStress_parent-pss_totalscore	pss01	pss_totalscore	NIH Toolbox Ipad App	Dummy Variable: NDA elements pss_distress_rs and pss_totalscore both contain Raw Scores for the Percieved Stress Instrumement (Inst) Specified. The former variable is where HCP Age- Adjusted National Percentile data were mapped for the instrument (Inst) specified. The latter is required to be non-empty, but seems to be capturing the same information.
			pss01-PercStress-pss_distress_rs	pss01	pss_distress_rs	NIH Toolbox Ipad App	Raw Score for the Perceived Stress Instrument (Inst) Specified
			pss01-PercStress-pss_totalscore	pss01	pss_totalscore	NIH Toolbox Ipad App	Dummy Variable: NDA elements pss_distress_rs and pss_totalscore both contain Raw Scores for the Percieved Stress Instrumement (Inst) Specified. The former variable is where HCP Age- Adjusted National Percentile data were mapped for the instrument (Inst) specified. The latter is required to be non-empty, but seems to be capturing the same information.
	Screen Time	Screen Time Survey (ages 5-21)	screentime01-caregiver-screentime1_p	screentime01	screentime1_p	parent	1. On a typical WEEKDAY, how much TIME does your child spend on a computer, cellphone, tablet, or other electronic device? Please do NOT include time spent on school related work, but do include watching TV, shows or videos, texting or chatting, playing games, or visiting social networking sites (Facebook, Twitter, Instagram). Hours:
			screentime01-caregiver-screentime2_p	screentime01	screentime2_p	parent	2. On a typical WEEKEND DAY, how much TIME does your child spend on a computer, cellphone, tablet, or other electronic device? Please do NOT include time spent on school related work, but do include watching TV, shows or videos, texting or chatting, playing games, or visiting social networking sites (Facebook, Twitter, Instagram). Hours:
			screentime01-self-screentime1_wkdy_y	screentime01	screentime1_wkdy_y	teen/child	1. On a typical weekday, how many hours do you: Watch TV shows or movies? 0 = None ; 0.25 = < 30 minutes ; 0.5 = 30 minutes ; 1 = 1 hour ; 2 = 2 hours ; 3 = 3 hours ; 4 = 4+ hours - partial times are rounded down
			screentime01-self-screentime10_wknd_y	screentime01	screentime10_wknd_y	teen/child	2. On a typical weekend day, how many hours do you: Text on a cell phone, tablet, or computer (GChat, Whatsapp, etc.)? 0 = None ; 0.25 = < 30 minutes ; 0.5 = 30 minutes ; 1 = 1 hour ; 2 = 2 hours ; 3 = 3 hours ; 4 = 4+ hours - partial times are rounded down
			screentime01-self-screentime11_wknd_y	screentime01	screentime11_wknd_y	teen/child	2. On a typical weekend day, how many hours do you: Visit social networking sites like Facebook, Twitter, Instagram, etc.? 0 = None ; 0.25 = < 30 minutes ; 0.5 = 30 minutes ; 1 = 1 hour ; 2 = 2 hours ; 3 = 3 hours ; 4 = 4+ hours - partial times are rounded down
			screentime01-self-screentime12_wknd_y	screentime01	screentime12_wknd_y	teen/child	2. On a typical weekend day, how many hours do you: Video chat (Skype, Facetime, etc.)? 0 = None ; 0.25 = < 30 minutes ; 0.5 = 30 minutes ; 1 = 1 hour ; 2 = 2 hours ; 3 = 3 hours ; 4 = 4+ hours - partial times are rounded down
			screentime01-self-screentime13_y	screentime01	screentime13_y	teen/child	3. How often do you play mature-rated video games (e.g., Call of Duty, Grand Theft Auto, Assassin's Creed, etc.)? 0 = Never ; 1 = Once in a while ; 2 = Regularly ; 3 = All the time
			screentime01-self-screentime14_y	screentime01	screentime14_y	teen/child	4. How often do you watch R-rated movies? 0 = Never ; 1 = Once in a while ; 2 = Regularly ; 3 = All the time
			screentime01-self-screentime2_wkdy_y	screentime01	screentime2_wkdy_y	teen/child	1. On a typical weekday, how many hours do you: Watch videos (such as YouTube)? 0 = None ; 0.25 = < 30 minutes ; 0.5 = 30 minutes ; 1 = 1 hour ; 2 = 2 hours ; 3 = 3 hours ; 4 = 4+ hours - partial times are rounded down
			screentime01-self-screentime3_wkdy_y	screentime01	screentime3_wkdy_y	teen/child	1. On a typical weekday, how many hours do you: Play video games on a computer, console, phone or other device (Xbox, Play Station, iPad)? 0 = None ; 0.25 = < 30 minutes ; 0.5 = 30 minutes ; 1 = 1 hour ; 2 = 2 hours ; 3 = 3 hours ; 4 = 4+ hours - partial times are rounded down
			screentime01-self-screentime4_wkdy_y	screentime01	screentime4_wkdy_y	teen/child	1. On a typical weekday, how many hours do you: Text on a cell phone, tablet, or computer (e.g. GChat, Whatsapp, etc.)? 0 = None ; 0.25 = < 30 minutes ; 0.5 = 30 minutes ; 1 = 1 hour ; 2 = 2 hours ; 3 = 3 hours ; 4 = 4+ hours - partial times are rounded down
			screentime01-self-screentime5_wkdy_y	screentime01	screentime5_wkdy_y	teen/child	1. On a typical weekday, how many hours do you: Visit social networking sites like Facebook, Twitter, Instagram, etc.? 0 = None ; 0.25 = < 30 minutes ; 0.5 = 30 minutes ; 1 = 1 hour ; 2 = 2 hours ; 3 = 3 hours ; 4 = 4+ hours - partial times are rounded down
			screentime01-self-screentime6_wkdy_y	screentime01	screentime6_wkdy_y	teen/child	1. On a typical weekday, how many hours do you: Video chat (Skype, Facetime, etc.)? 0 = None ; 0.25 = < 30 minutes ; 0.5 = 30 minutes ; 1 = 1 hour ; 2 = 2 hours ; 3 = 3 hours ; 4 = 4+ hours - partial times are rounded down
			screentime01-self-screentime7_wknd_y	screentime01	screentime7_wknd_y	teen/child	2. On a typical weekend day, how many hours do you: Watch TV shows or movies? 0 = None ; 0.25 = < 30 minutes ; 0.5 = 30 minutes ; 1 = 1 hour ; 2 = 2 hours ; 3 = 3 hours ; 4 = 4+ hours - partial times are rounded down
			screentime01-self-screentime8_wknd_y	screentime01	screentime8_wknd_y	teen/child	2. On a typical weekend day, how many hours do you: Watch videos (such as YouTube)? 0 = None ; 0.25 = < 30 minutes ; 0.5 = 30 minutes ; 1 = 1 hour ; 2 = 2 hours ; 3 = 3 hours ; 4 = 4+ hours - partial times are rounded down
			screentime01-self-screentime9_wknd_y	screentime01	screentime9_wknd_y	teen/child	2. On a typical weekend day, how many hours do you: Play video games on a computer, console, phone or other device (Xbox, Play Station, iPad)? 0 = None ; 0.25 = < 30 minutes ; 0.5 = 30 minutes ; 1 = 1 hour ; 2 = 2 hours ; 3 = 3 hours ; 4 = 4+ hours - partial times are rounded down
	Sleep	Sleep Disturbances Scale for Children (SDSC; ages 5-12)	sleepdis01-sleepdisturb_arsal	sleepdis01	sleepdisturb_arsal	parent	Sleep Scale for Childen Scores: Disorders of arousal
			sleepdis01-sleepdisturb_brth	sleepdis01	sleepdisturb_brth	parent	Sleep Scale for Childen Scores: Sleep Breathing Disorders
			sleepdis01-sleepdisturb_hype	sleepdis01	sleepdisturb_hype	parent	Sleep Scale for Childen Scores: Sleep Hyperhydrosis
			sleepdis01-sleepdisturb_mtan	sleepdis01	sleepdisturb_mtan	parent	Sleep Scale for Childen Scores: Disorders of initiating and maintaining sleep
			sleepdis01-sleepdisturb_somn	sleepdis01	sleepdisturb_somn	parent	Sleep Scale for Childen Scores: Disorders of excessive somnolence
			sleepdis01-sleepdisturb_total	sleepdis01	sleepdisturb_total	parent	Sleep Scale for Childen Scores: Total score
			sleepdis01-sleepdisturb_trans	sleepdis01	sleepdisturb_trans	parent	Sleep Scale for Childen Scores: Sleep-Wake Transition Disorders
	Social Distress	Perceived Hostility Survey (ages 8+ and parents)	tlbx_perhost01-PerceHost-nih_tlbx_rawscore	tlbx_perhost01	nih_tlbx_rawscore	NIH Toolbox Ipad App	Raw Score for the Perceived Hostility FF Instrument (Inst) Specified
		Peer Rejection Survey (ages 5-12)	tlbx_rej01-caregiver-pr_score	tlbx_rej01	pr_score	NIH Toolbox Ipad App	Raw Score for the Perceived Rejection Instrument (Inst) Specified
			tlbx_rej01-PeerReject_parent-pr_score	tlbx_rej01	pr_score	NIH Toolbox Ipad App	Raw Score for the Perceived Rejection Instrument (Inst) Specified
			tlbx_rej01-PercReject-pr_score	tlbx_rej01	pr_score	NIH Toolbox Ipad App	Raw Score for the Perceived Rejection Instrument (Inst) Specified
			tlbx_rej01-self-pr_score	tlbx_rej01	pr_score	NIH Toolbox Ipad App	Raw Score for the Perceived Rejection Instrument (Inst) Specified
	Social Responsiveness	Social Responsiveness Scale - 2 (SRS-2; ages 5-21)	srs02-self-srsa52	srs02	srsa52	teen/child	SUBJECT: 52. I get overly loud without realizing it. 1 = Not true; 2 = Sometimes true; 3 = Often true; 4 = Almost always true
	Sociodemographics	Demographics Form	socdem01-annual_fam_inc	socdem01	annual_fam_inc	teen	SUBJECT: The last year that you were living at home with your family (which might be this year), what was your family income? -999999 = Don't know or don't want to say
			socdem01-calm_inc1	socdem01	calm_inc1	teen	SUBJECT: How much did you earn, before taxes and other deductions, during the past 12 months? ENTER INCOME: 98=Don't know or don't want to say
			socdem01-cg1_nimh_rv_dem_03	socdem01	cg1_nimh_rv_dem_03	parent	CAREGIVER: What is your current gender identity? 0=Male; 1=Female; 2=Trans male/Trans man; 3=Trans female/Trans woman; 4=Genderqueer or Gender non-conforming; 5=Different identity; 7 = Refused; 8 = Don't Know
			socdem01-cg1_sub_income	socdem01	cg1_sub_income	parent	CAREGIVER: How much did you earn, before taxes and other deductions, during the past 12 months? 1 =Less than $5,000 ; 2 =$5,000 through $11,999 ; 3 =$12,000 through $15,999 ; 4 =$16,000 through $24,999 ; 5 =$25,000 through $34,999 ; 6 =$35,000 through $49,999 ; 7 =$50,000 through $74,999 ; 8 =$75,000 through $99,999 ; 9 =$100,000 through $199,999 ; 10 =$200,000 and greater; 99 = Don't Know; 999 =…
			socdem01-cg1_ustime	socdem01	cg1_ustime	parent	CAREGIVER: How many years have you lived in the United States:
			socdem01-father_edu_cat	socdem01	father_edu_cat	teen	SUBJECT: What is the highest grade or level of school your father has completed or the highest degree he has received? 0 = Never attended or Kindergarten only; 1-11 = Grades 1=11; 12 = High school No diploma; 13 = GED or equivalent; 14 = High school graduate; 15 = Completed 12 years of school (but unable to determine if code 12, 13, or 14); 16 = Some college, no degree; 17 = Associate degree: occ…
			socdem01-household_number_in_house	socdem01	household_number_in_house	teen	SUBJECT: The last year that you were living at home with your family (which might be this year). How many people lived in the home?
			socdem01-mother_edu_cat	socdem01	mother_edu_cat	teen	SUBJECT: What is the highest grade or level of school your mother has completed or the highest degree she has received? 0 = Never attended or Kindergarten only; 1-11 = Grades 1=11; 12 = High school No diploma; 13 = GED or equivalent; 14 = High school graduate; 15 = Completed 12 years of school (but unable to determine if code 12, 13, or 14); 16 = Some college, no degree; 17 = Associate degree: oc…
			socdem01-preg_age_dad	socdem01	preg_age_dad	teen	SUBJECT: How old in years was your biological father when you were born?
			socdem01-preg_age_mom	socdem01	preg_age_mom	teen	SUBJECT: How old in years was your biological mother when you were born?
			socdem01-ptner_income	socdem01	ptner_income	parent	CAREGIVER: How much did your PARTNER earn, before taxes and other deductions, during the past 12 months? 1 = Less than $5,000 ; 2 = $5,000 through $11,999 ; 3 = $12,000 through $15,999 ; 4 = $16,000 through $24,999 ; 5 = $25,000 through $34,999 ; 6 = $35,000 through $49,999 ; 7 = $50,000 through $74,999 ; 8 = $75,000 through $99,999 ; 9 = $100,000 through $199,999 ; 10 = $200,000 and greater ; 99…
			socdem01-ptner_job	socdem01	ptner_job	parent	CAREGIVER: We would like to know about what your PARTNER does--are they working now, looking for work, retired, taking care of children, a student, or what? 1 = WORKING NOW ; 2 = ONLY TEMPORARILY LAID OFF ; 2.1 = SICK LEAVE ; 2.2 = MATERNITY LEAVE ; 3.1 = UNEMPLOYED, LOOKING FOR WORK ; 3.2 = UNEMPLOYED, NOT LOOKING FOR WORK ; 4 = RETIRED ; 5 = DISABLED, PERMANENTLY OR TEMPORARILY ; 6 = TAKING CAR…
			socdem01-ptner_yn	socdem01	ptner_yn	parent	CAREGIVER: Do you have a PARTNER?
			socdem01-ustime	socdem01	ustime	teen	SUBJECT: How many years have you lived in the United States:
	Sports and Activities	Sports and Activities Involvement Questionnaire (ages 5-17)	saiq01-ccf_sai_p_art_nmonth	saiq01	ccf_sai_p_art_nmonth	parent	Drawing, Painting, Graphic Art, Photography, Pottery, Sculpting : During the most active period, about how many months per year did your child participate in this activity? 0 = Don't know ; 1 = 1 ; 2 = 2 ; 3 = 3 ; 4 = 4 ; 5 = 5 ; 6 = 6 ; 7 = 7 ; 8 = 8 ; 9 = 9 ; 10 = 10 ; 11 = 11 ; 12 = 12
			saiq01-ccf_sai_p_art_nyr	saiq01	ccf_sai_p_art_nyr	parent	Drawing, Painting, Graphic Art, Photography, Pottery, Sculpting : For how many years did your child participate in this activity? 0 = Don't know ; 1 = 1 ; 2 = 2 ; 3 = 3 ; 4 = 4 ; 5 = 5 ; 6 = 6 ; 7 = 7 ; 8 = 8 ; 9 = 9 ; 10 = 10
			saiq01-ccf_sai_p_art_perwk	saiq01	ccf_sai_p_art_perwk	parent	Drawing, Painting, Graphic Art, Photography, Pottery, Sculpting : During the most active period, about how many days per week did your child participate in this activity? 0 = Don't know ; 1 = 1 ; 2 = 2 ; 3 = 3 ; 4 = 4 ; 5 = 5 ; 6 = 6 ; 7 = 7 ; 8 = Once every 2 weeks ; 9 = One day every month ; 10 = Less than one day per month
			saiq01-ccf_sai_p_art_tspent	saiq01	ccf_sai_p_art_tspent	parent	Drawing, Painting, Graphic Art, Photography, Pottery, Sculpting : During the most active period, about how many minutes per session did your child participate in this activity? 0 = Don't know ; 1 = less than 30 minutes ; 2 = 30 ; 3 = 45 ; 4 = 60 (1 hr) ; 5 = 90 (1.5 hrs) ; 6 = 120 (2 hrs) ; 7 = 150 (2.5 hrs) ; 8 = 180 (3 hrs) ; 9 = greater than 3 hours
			saiq01-ccf_sai_p_base_nmonth	saiq01	ccf_sai_p_base_nmonth	parent	Baseball, Softball : During the most active period, about how many months per year did your child participate in this activity? 0 = Don't know ; 1 = 1 ; 2 = 2 ; 3 = 3 ; 4 = 4 ; 5 = 5 ; 6 = 6 ; 7 = 7 ; 8 = 8 ; 9 = 9 ; 10 = 10 ; 11 = 11 ; 12 = 12
			saiq01-ccf_sai_p_base_nyr	saiq01	ccf_sai_p_base_nyr	parent	Baseball, Softball : For how many years did your child participate in this activity? 0 = Don't know ; 1 = 1 ; 2 = 2 ; 3 = 3 ; 4 = 4 ; 5 = 5 ; 6 = 6 ; 7 = 7 ; 8 = 8 ; 9 = 9 ; 10 = 10
			saiq01-ccf_sai_p_base_perwk	saiq01	ccf_sai_p_base_perwk	parent	Baseball, Softball : During the most active period, about how many days per week did your child participate in this activity? 0 = Don't know ; 1 = 1 ; 2 = 2 ; 3 = 3 ; 4 = 4 ; 5 = 5 ; 6 = 6 ; 7 = 7 ; 8 = Once every 2 weeks ; 9 = One day every month ; 10 = Less than one day per month
			saiq01-ccf_sai_p_base_tspent	saiq01	ccf_sai_p_base_tspent	parent	Baseball, Softball : During the most active period, about how many minutes per session did your child participate in this activity? 0 = Don't know ; 1 = less than 30 minutes ; 2 = 30 ; 3 = 45 ; 4 = 60 (1 hr) ; 5 = 90 (1.5 hrs) ; 6 = 120 (2 hrs) ; 7 = 150 (2.5 hrs) ; 8 = 180 (3 hrs) ; 9 = greater than 3 hours
			saiq01-ccf_sai_p_basket_nmonth	saiq01	ccf_sai_p_basket_nmonth	parent	Basketball: During the most active period, about how many months per year did your child participate in this activity? 0 = Don't know ; 1 = 1 ; 2 = 2 ; 3 = 3 ; 4 = 4 ; 5 = 5 ; 6 = 6 ; 7 = 7 ; 8 = 8 ; 9 = 9 ; 10 = 10 ; 11 = 11 ; 12 = 12
			saiq01-ccf_sai_p_basket_nyr	saiq01	ccf_sai_p_basket_nyr	parent	Basketball: For how many years did your child participate in this activity? 0 = Don't know ; 1 = 1 ; 2 = 2 ; 3 = 3 ; 4 = 4 ; 5 = 5 ; 6 = 6 ; 7 = 7 ; 8 = 8 ; 9 = 9 ; 10 = 10
			saiq01-ccf_sai_p_basket_perwk	saiq01	ccf_sai_p_basket_perwk	parent	Basketball: During the most active period, about how many days per week did your child participate in this activity? 0 = Don't know ; 1 = 1 ; 2 = 2 ; 3 = 3 ; 4 = 4 ; 5 = 5 ; 6 = 6 ; 7 = 7 ; 8 = Once every 2 weeks ; 9 = One day every month ; 10 = Less than one day per month
			saiq01-ccf_sai_p_basket_tspent	saiq01	ccf_sai_p_basket_tspent	parent	Basketball: During the most active period, about how many minutes per session did your child participate in this activity? 0 = Don't know ; 1 = less than 30 minutes ; 2 = 30 ; 3 = 45 ; 4 = 60 (1 hr) ; 5 = 90 (1.5 hrs) ; 6 = 120 (2 hrs) ; 7 = 150 (2.5 hrs) ; 8 = 180 (3 hrs) ; 9 = greater than 3 hours
			saiq01-ccf_sai_p_dance_nmonth	saiq01	ccf_sai_p_dance_nmonth	parent	Ballet, Dance: During the most active period, about how many months per year did your child participate in this activity? 0 = Don't know ; 1 = 1 ; 2 = 2 ; 3 = 3 ; 4 = 4 ; 5 = 5 ; 6 = 6 ; 7 = 7 ; 8 = 8 ; 9 = 9 ; 10 = 10 ; 11 = 11 ; 12 = 12
			saiq01-ccf_sai_p_dance_nyr	saiq01	ccf_sai_p_dance_nyr	parent	Ballet, Dance: For how many years did your child participate in this activity? 0 = Don't know ; 1 = 1 ; 2 = 2 ; 3 = 3 ; 4 = 4 ; 5 = 5 ; 6 = 6 ; 7 = 7 ; 8 = 8 ; 9 = 9 ; 10 = 10
			saiq01-ccf_sai_p_dance_perwk	saiq01	ccf_sai_p_dance_perwk	parent	Ballet, Dance: During the most active period, about how many days per week did your child participate in this activity? 0 = Don't know ; 1 = 1 ; 2 = 2 ; 3 = 3 ; 4 = 4 ; 5 = 5 ; 6 = 6 ; 7 = 7 ; 8 = Once every 2 weeks ; 9 = One day every month ; 10 = Less than one day per month
			saiq01-ccf_sai_p_dance_tspent	saiq01	ccf_sai_p_dance_tspent	parent	Ballet, Dance: During the most active period, about how many minutes per session did your child participate in this activity? 0 = Don't know ; 1 = less than 30 minutes ; 2 = 30 ; 3 = 45 ; 4 = 60 (1 hr) ; 5 = 90 (1.5 hrs) ; 6 = 120 (2 hrs) ; 7 = 150 (2.5 hrs) ; 8 = 180 (3 hrs) ; 9 = greater than 3 hours
			saiq01-ccf_sai_p_drama_nmonth	saiq01	ccf_sai_p_drama_nmonth	parent	Drama, Theater, Acting, Film: During the most active period, about how many months per year did your child participate in this activity? 0 = Don't know ; 1 = 1 ; 2 = 2 ; 3 = 3 ; 4 = 4 ; 5 = 5 ; 6 = 6 ; 7 = 7 ; 8 = 8 ; 9 = 9 ; 10 = 10 ; 11 = 11 ; 12 = 12
			saiq01-ccf_sai_p_drama_nyr	saiq01	ccf_sai_p_drama_nyr	parent	Drama, Theater, Acting, Film: For how many years did your child participate in this activity? 0 = Don't know ; 1 = 1 ; 2 = 2 ; 3 = 3 ; 4 = 4 ; 5 = 5 ; 6 = 6 ; 7 = 7 ; 8 = 8 ; 9 = 9 ; 10 = 10
			saiq01-ccf_sai_p_drama_perwk	saiq01	ccf_sai_p_drama_perwk	parent	Drama, Theater, Acting, Film: During the most active period, about how many days per week did your child participate in this activity? 0 = Don't know ; 1 = 1 ; 2 = 2 ; 3 = 3 ; 4 = 4 ; 5 = 5 ; 6 = 6 ; 7 = 7 ; 8 = Once every 2 weeks ; 9 = One day every month ; 10 = Less than one day per month
			saiq01-ccf_sai_p_drama_tspent	saiq01	ccf_sai_p_drama_tspent	parent	Drama, Theater, Acting, Film: During the most active period, about how many minutes per session did your child participate in this activity? 0 = Don't know ; 1 = less than 30 minutes ; 2 = 30 ; 3 = 45 ; 4 = 60 (1 hr) ; 5 = 90 (1.5 hrs) ; 6 = 120 (2 hrs) ; 7 = 150 (2.5 hrs) ; 8 = 180 (3 hrs) ; 9 = greater than 3 hours
			saiq01-ccf_sai_p_gym_nmonth	saiq01	ccf_sai_p_gym_nmonth	parent	Gymnastics: During the most active period, about how many months per year did your child participate in this activity? 0 = Don't know ; 1 = 1 ; 2 = 2 ; 3 = 3 ; 4 = 4 ; 5 = 5 ; 6 = 6 ; 7 = 7 ; 8 = 8 ; 9 = 9 ; 10 = 10 ; 11 = 11 ; 12 = 12
			saiq01-ccf_sai_p_gym_nyr	saiq01	ccf_sai_p_gym_nyr	parent	Gymnastics: For how many years did your child participate in this activity? 0 = Don't know ; 1 = 1 ; 2 = 2 ; 3 = 3 ; 4 = 4 ; 5 = 5 ; 6 = 6 ; 7 = 7 ; 8 = 8 ; 9 = 9 ; 10 = 10
			saiq01-ccf_sai_p_gym_perwk	saiq01	ccf_sai_p_gym_perwk	parent	Gymnastics: During the most active period, about how many days per week did your child participate in this activity? 0 = Don't know ; 1 = 1 ; 2 = 2 ; 3 = 3 ; 4 = 4 ; 5 = 5 ; 6 = 6 ; 7 = 7 ; 8 = Once every 2 weeks ; 9 = One day every month ; 10 = Less than one day per month
			saiq01-ccf_sai_p_gym_tspent	saiq01	ccf_sai_p_gym_tspent	parent	Gymnastics: During the most active period, about how many minutes per session did your child participate in this activity? 0 = Don't know ; 1 = less than 30 minutes ; 2 = 30 ; 3 = 45 ; 4 = 60 (1 hr) ; 5 = 90 (1.5 hrs) ; 6 = 120 (2 hrs) ; 7 = 150 (2.5 hrs) ; 8 = 180 (3 hrs) ; 9 = greater than 3 hours
			saiq01-ccf_sai_p_music_nmonth	saiq01	ccf_sai_p_music_nmonth	parent	Musical Instrument(Singing, Choir, Guitar, Piano, Drums, Violin, Flute, Band, Rock Band, Orchestra): During the most active period, about how many months per year did your child participate in this activity? 0 = Don't know ; 1 = 1 ; 2 = 2 ; 3 = 3 ; 4 = 4 ; 5 = 5 ; 6 = 6 ; 7 = 7 ; 8 = 8 ; 9 = 9 ; 10 = 10 ; 11 = 11 ; 12 = 12
			saiq01-ccf_sai_p_music_nyr	saiq01	ccf_sai_p_music_nyr	parent	Musical Instrument(Singing, Choir, Guitar, Piano, Drums, Violin, Flute, Band, Rock Band, Orchestra): For how many years did your child participate in this activity? 0 = Don't know ; 1 = 1 ; 2 = 2 ; 3 = 3 ; 4 = 4 ; 5 = 5 ; 6 = 6 ; 7 = 7 ; 8 = 8 ; 9 = 9 ; 10 = 10
			saiq01-ccf_sai_p_music_outside	saiq01	ccf_sai_p_music_outside	parent	Musical Instrument(Singing, Choir, Guitar, Piano, Drums, Violin, Flute, Band, Rock Band, Orchestra): Was any of this activity part of an organized team, group, band, orchestra, chorus, or program outside of school? 1 = Yes ; 0 = No
			saiq01-ccf_sai_p_music_p12	saiq01	ccf_sai_p_music_p12	parent	Musical Instrument(Singing, Choir, Guitar, Piano, Drums, Violin, Flute, Band, Rock Band, Orchestra): Did your child participate in this activity in the past 12 months? 0 = No; 1 = Yes
			saiq01-ccf_sai_p_music_perwk	saiq01	ccf_sai_p_music_perwk	parent	Musical Instrument(Singing, Choir, Guitar, Piano, Drums, Violin, Flute, Band, Rock Band, Orchestra): During the most active period, about how many days per week did your child participate in this activity? 0 = Don't know ; 1 = 1 ; 2 = 2 ; 3 = 3 ; 4 = 4 ; 5 = 5 ; 6 = 6 ; 7 = 7 ; 8 = Once every 2 weeks ; 9 = One day every month ; 10 = Less than one day per month
			saiq01-ccf_sai_p_music_tspent	saiq01	ccf_sai_p_music_tspent	parent	Musical Instrument(Singing, Choir, Guitar, Piano, Drums, Violin, Flute, Band, Rock Band, Orchestra): During the most active period, about how many minutes per session did your child participate in this activity? 0 = Don't know ; 1 = less than 30 minutes ; 2 = 30 ; 3 = 45 ; 4 = 60 (1 hr) ; 5 = 90 (1.5 hrs) ; 6 = 120 (2 hrs) ; 7 = 150 (2.5 hrs) ; 8 = 180 (3 hrs) ; 9 = greater than 3 hours
			saiq01-ccf_sai_p_soc_nmonth	saiq01	ccf_sai_p_soc_nmonth	parent	Soccer: During the most active period, about how many months per year did your child participate in this activity? 0 = Don't know ; 1 = 1 ; 2 = 2 ; 3 = 3 ; 4 = 4 ; 5 = 5 ; 6 = 6 ; 7 = 7 ; 8 = 8 ; 9 = 9 ; 10 = 10 ; 11 = 11 ; 12 = 12
			saiq01-ccf_sai_p_soc_nyr	saiq01	ccf_sai_p_soc_nyr	parent	Soccer: For how many years did your child participate in this activity? 0 = Don't know ; 1 = 1 ; 2 = 2 ; 3 = 3 ; 4 = 4 ; 5 = 5 ; 6 = 6 ; 7 = 7 ; 8 = 8 ; 9 = 9 ; 10 = 10
			saiq01-ccf_sai_p_soc_perwk	saiq01	ccf_sai_p_soc_perwk	parent	Soccer: During the most active period, about how many days per week did your child participate in this activity? 0 = Don't know ; 1 = 1 ; 2 = 2 ; 3 = 3 ; 4 = 4 ; 5 = 5 ; 6 = 6 ; 7 = 7 ; 8 = Once every 2 weeks ; 9 = One day every month ; 10 = Less than one day per month
			saiq01-ccf_sai_p_soc_tspent	saiq01	ccf_sai_p_soc_tspent	parent	Soccer: During the most active period, about how many minutes per session did your child participate in this activity? 0 = Don't know ; 1 = less than 30 minutes ; 2 = 30 ; 3 = 45 ; 4 = 60 (1 hr) ; 5 = 90 (1.5 hrs) ; 6 = 120 (2 hrs) ; 7 = 150 (2.5 hrs) ; 8 = 180 (3 hrs) ; 9 = greater than 3 hours
			saiq01-ccf_sai_p_wpolo_nmonth	saiq01	ccf_sai_p_wpolo_nmonth	parent	Swimming, Water Polo: During the most active period, about how many months per year did your child participate in this activity? 0 = Don't know ; 1 = 1 ; 2 = 2 ; 3 = 3 ; 4 = 4 ; 5 = 5 ; 6 = 6 ; 7 = 7 ; 8 = 8 ; 9 = 9 ; 10 = 10 ; 11 = 11 ; 12 = 12
			saiq01-ccf_sai_p_wpolo_nyr	saiq01	ccf_sai_p_wpolo_nyr	parent	Swimming, Water Polo: For how many years did your child participate in this activity? 0 = Don't know ; 1 = 1 ; 2 = 2 ; 3 = 3 ; 4 = 4 ; 5 = 5 ; 6 = 6 ; 7 = 7 ; 8 = 8 ; 9 = 9 ; 10 = 10
			saiq01-ccf_sai_p_wpolo_perwk	saiq01	ccf_sai_p_wpolo_perwk	parent	Swimming, Water Polo: During the most active period, about how many days per week did your child participate in this activity? 0 = Don't know ; 1 = 1 ; 2 = 2 ; 3 = 3 ; 4 = 4 ; 5 = 5 ; 6 = 6 ; 7 = 7 ; 8 = Once every 2 weeks ; 9 = One day every month ; 10 = Less than one day per month
			saiq01-ccf_sai_p_wpolo_tspent	saiq01	ccf_sai_p_wpolo_tspent	parent	Swimming, Water Polo: During the most active period, about how many minutes per session did your child participate in this activity? 0 = Don't know ; 1 = less than 30 minutes ; 2 = 30 ; 3 = 45 ; 4 = 60 (1 hr) ; 5 = 90 (1.5 hrs) ; 6 = 120 (2 hrs) ; 7 = 150 (2.5 hrs) ; 8 = 180 (3 hrs) ; 9 = greater than 3 hours
	Stress and self efficacy	Self-Efficacy Survey (ages 8+ and parents)	self_effic01-caregiver-nih_tlbx_rawscore	self_effic01	nih_tlbx_rawscore	NIH Toolbox Ipad App	Raw Score for the Self-Efficacy Instrument (Inst) Specified
			self_effic01-self-nih_tlbx_rawscore	self_effic01	nih_tlbx_rawscore	NIH Toolbox Ipad App	Raw Score for the Self-Efficacy Instrument (Inst) Specified
Motor	Dexterity	NIH Toolbox - 9-hole Pegboard Test (ages 5-21 & Parents)	tlbx_motor01-Dexterity-grip_standardsc_dom	tlbx_motor01	grip_standardsc_dom	NIH Toolbox Ipad App	9-Hole Pegboard Dexterity Test Dominant Score
	Endurance	NIH Toolbox - 2-minute Walk Test (ages 5+ & Parents)	tlbx_motor01-Endurance-raw_wet	tlbx_motor01	raw_wet	NIH Toolbox Ipad App	2-Minute Walk Endurance Test Raw Score
	Locomotion	NIH Toolbox- 4-meter Walk Test (ages 7+ & Parents)	tlbx_motor01-GaitSpeed-loco_rawscore	tlbx_motor01	loco_rawscore	NIH Toolbox Ipad App	Locomotion - 4 meter walk - Raw Score
	Strength	NIH Toolbox - Grip Strength Dynamometry Test (ages 5+ & Parents)	tlbx_motor01-Strength-nih_tlbx_domsc	tlbx_motor01	nih_tlbx_domsc	NIH Toolbox Ipad App	Grip Strength Test Uncorrected Standard Scores Dominant hand
Physical Health and Medical History	Clinical Assessments	Medications and Treatments Form	mendt01-caregiver-othmed0a	mendt01	othmed0a	teen/parent	Are you/your child taking any medication, either prescription or over-the-counter. These include pills, liquid medications; skin patches, eye drops, creams, salves, inhalers and injections. Please don't inlcude vitamins or supplements. 0 = No; 1 = Yes
			mendt01-self-othmed0a	mendt01	othmed0a	teen/parent	Are you/your child taking any medication, either prescription or over-the-counter. These include pills, liquid medications; skin patches, eye drops, creams, salves, inhalers and injections. Please don't inlcude vitamins or supplements. 0 = No; 1 = Yes
	Developmental History	Maternal and Birth History Query	mab01-devhis_8_alchohol_avg	mab01	devhis_8_alchohol_avg	parent	Before the biological mother found out she was pregnant, but while she might have been pregnant with this child: Specify: Alcohol: Average drinks per/week:
			mab01-devhis_8_alchohol_max	mab01	devhis_8_alchohol_max	parent	Before the biological mother found out she was pregnant, but while she might have been pregnant with this child: Specify: Alcohol: Maximum drinks in one sitting?
			mab01-devhis_8_alcohol	mab01	devhis_8_alcohol	parent	Before the biological mother found out she was pregnant, but while she might have been pregnant with this child: Specify: Alcohol used?
			mab01-devhis_8_alcohol_effects	mab01	devhis_8_alcohol_effects	parent	Before the biological mother found out she was pregnant, but while she might have been pregnant with this child: Specify: Alcohol: How many drinks did it take to feel the effects of alcohol?
			mab01-devhis_8_coc_crack	mab01	devhis_8_coc_crack	parent	Before the biological mother found out she was pregnant, but while she might have been pregnant with this child: Specify: Cocaine/Crack used?
			mab01-devhis_8_her_morph	mab01	devhis_8_her_morph	parent	Before the biological mother found out she was pregnant, but while she might have been pregnant with this child: Specify: Heroin/Morphine used?
			mab01-devhis_8_marijuana	mab01	devhis_8_marijuana	parent	Before the biological mother found out she was pregnant, but while she might have been pregnant with this child: Specify: Marijuana used?
			mab01-devhis_8_other_drugs	mab01	devhis_8_other_drugs	parent	Before the biological mother found out she was pregnant, but while she might have been pregnant with this child: Specify: Any other drugs used?
			mab01-devhis_8_oxycont	mab01	devhis_8_oxycont	parent	Before the biological mother found out she was pregnant, but while she might have been pregnant with this child: Specify: Oxycontin used?
			mab01-devhis_8_prescript_medyn	mab01	devhis_8_prescript_medyn	parent	Before the biological mother found out she was pregnant, but while she might have been pregnant with this child, did she use: Prescription medications?
			mab01-devhis_8_tobacco	mab01	devhis_8_tobacco	parent	Before the biological mother found out she was pregnant, but while she might have been pregnant with this child: Specify: Tobacco used?
			mab01-devhis_9_other_drugs	mab01	devhis_9_other_drugs	parent	Once the biological mother knew she was pregnant, did biological mother use : Specify: Any other drugs used?
			mab01-devhis_9_oxycont	mab01	devhis_9_oxycont	parent	Once the biological mother knew she was pregnant, did biological mother use : Specify: Oxycontin used?
			mab01-devhis_caffeine_11	mab01	devhis_caffeine_11	parent	Did you/biological mother have any caffeine during pregnancy (from conception until delivery)?
			mab01-devhis_caffeine_amt	mab01	devhis_caffeine_amt	parent	If you/biological mother had caffeine during pregnancy (from conception until delivery) How much caffeine/day (cups/day)?
			mab01-how_long_pregnant	mab01	how_long_pregnant	parent	How far along were you with your child when you found out that you were pregnant?
	Parental History of Psychiatric or Neurological Disorders	Parental History of Psychiatric or Neurological Disorders	fenvs01-caregiver-fes_y_ss_fc	fenvs01	fes_y_ss_fc	teen/child/parent	Conflict Subscale from the Family Environment Scale: RAW Score: ([conflict_p1], [conflict_p2_r], [conflict_p3], [conflict_p4_r], [conflict_p5], [conflict_p6], [conflict_p7_r], [conflict_p8], [conflict_p9_r]) _r indicates reverse scored. Validation: Minimum of 5 items answered
			fenvs01-self-fes_y_ss_fc	fenvs01	fes_y_ss_fc	teen/child/parent	Conflict Subscale from the Family Environment Scale: RAW Score: ([conflict_p1], [conflict_p2_r], [conflict_p3], [conflict_p4_r], [conflict_p5], [conflict_p6], [conflict_p7_r], [conflict_p8], [conflict_p9_r]) _r indicates reverse scored. Validation: Minimum of 5 items answered
Psychopathology Clinical Assessments	Achenbach assessments	Achenbach Adult Self Report (ASR; ages 18 – 59 )	asr01-abcl_critical_total	asr01	abcl_critical_total	teen/child	Critical Items Syndrome Score
			asr01-abcl_other_total	asr01	abcl_other_total	teen/child	Other Problems Syndrome Score
			asr01-adh_h_i_total	asr01	adh_h_i_total	teen/child	Attention Deficit/Hyperactivity Problems Subscales: Hyperactivity-Impulsivity (H-I) Total:
			asr01-adh_i_total	asr01	adh_i_total	teen/child	Attention Deficit/Hyperactivity Problems Subscales: Inattention (I) Total:
			asr01-adh_total	asr01	adh_total	teen/child	5. AD/H Problems Total:
			asr01-aggressive_behavior_total	asr01	aggressive_behavior_total	teen/child	Aggressive Behavior Syndrome Score
			asr01-antisocial_total	asr01	antisocial_total	teen/child	6. Antisocial Personality Problems Total:
			asr01-anxiety_total	asr01	anxiety_total	teen/child	2. Anxiety Problems Total:
			asr01-anxious__depressed_total	asr01	anxious__depressed_total	teen/child	Anxious/Depressed Syndrome Score
			asr01-asr_scr_thought_r	asr01	asr_scr_thought_r	teen/child	Thought Problems Syndrome Score
			asr01-asr_syn_csum	asr01	asr_syn_csum	teen/child	C Sum Syndrome Score
			asr01-attention_problems_total	asr01	attention_problems_total	teen/child	Attention Problems Syndrome Score
			asr01-avoidant_total	asr01	avoidant_total	teen/child	4. Avoidant Personality Problems Total:
			asr01-depressive_total	asr01	depressive_total	teen/child	1. Depressive Problems Total:
			asr01-externalizing_problems_total	asr01	externalizing_problems_total	teen/child	External Syndrome Score
			asr01-internalizing_problems_total	asr01	internalizing_problems_total	teen/child	Internal Syndrome Score
			asr01-kksomar	asr01	kksomar	teen/child	Somatic Complaints Syndrome Score
			asr01-rule_breaking_behavior_total	asr01	rule_breaking_behavior_total	teen/child	Rule-Breaking Behavior Syndrome Score
			asr01-somatic_complaints_total	asr01	somatic_complaints_total	teen/child	3. Somatic Problems Total:
			asr01-thought_problems_total	asr01	thought_problems_total	teen/child	Intrusive Syndrome Score
			asr01-total_problems_total	asr01	total_problems_total	teen/child	Total Syndrome Score
			asr01-withdrawn_total	asr01	withdrawn_total	teen/child	Withdrawn Syndrome Score
		Achenbach Child Behavior Checklist (CBCL; ages 5-17)	cbcl01-abcl_other_total	cbcl01	abcl_other_total	parent	CBCL Age 6-18 Other Problems Scale. See REDCap calculation in hcp_choices_calcs column
			cbcl01-cbcl_adhd_raw	cbcl01	cbcl_adhd_raw	parent	CBCL Age 6-18 Attention Deficit / Hyperactivity Problems. See REDCap calculation in hcp_choices_calcs column
			cbcl01-cbcl_aggressive_raw	cbcl01	cbcl_aggressive_raw	parent	CBCL Age 6-18 Aggressive Behavior Scale. See REDCap calculation in hcp_choices_calcs column
			cbcl01-cbcl_anxiety_raw	cbcl01	cbcl_anxiety_raw	parent	CBCL Age 6-18 Anxiety Problems Scale. See REDCap calculation in hcp_choices_calcs column
			cbcl01-cbcl_anxious_raw	cbcl01	cbcl_anxious_raw	parent	CBCL Age 6-18 Anxious / Depressed Scale. See REDCap calculation in hcp_choices_calcs column
			cbcl01-cbcl_attention_raw	cbcl01	cbcl_attention_raw	parent	CBCL Age 6-18 Attention Problems Scale. See REDCap calculation in hcp_choices_calcs column
			cbcl01-cbcl_conduct_raw	cbcl01	cbcl_conduct_raw	parent	CBCL Age 6-18 Conduct Problems Scale. See REDCap calculation in hcp_choices_calcs column
			cbcl01-cbcl_depresspr_raw	cbcl01	cbcl_depresspr_raw	parent	CBCL Age 6-18 Depressive Problems Scale. See REDCap calculation in hcp_choices_calcs column
			cbcl01-cbcl_external_raw	cbcl01	cbcl_external_raw	parent	CBCL Age 6-18 External (B) Scale. See REDCap calculation in hcp_choices_calcs column
			cbcl01-cbcl_internal_raw	cbcl01	cbcl_internal_raw	parent	CBCL Age 6-18 Internal (A) Scale. See REDCap calculation in hcp_choices_calcs column
			cbcl01-cbcl_oppositional_raw	cbcl01	cbcl_oppositional_raw	parent	CBCL Age 6-18 Oppositional Defiant Problems Scale. See REDCap calculation in hcp_choices_calcs column
			cbcl01-cbcl_rulebreak_raw	cbcl01	cbcl_rulebreak_raw	parent	CBCL Age 6-18 Rule-Breaking Behavior Scale . See REDCap calculation in hcp_choices_calcs column
			cbcl01-cbcl_social_p_raw	cbcl01	cbcl_social_p_raw	parent	CBCL Age 6-18 Social Problems Scale. See REDCap calculation in hcp_choices_calcs column
			cbcl01-cbcl_somatic_c_raw	cbcl01	cbcl_somatic_c_raw	parent	CBCL Age 6-18 Somatic Complaints Scale. See REDCap calculation in hcp_choices_calcs column
			cbcl01-cbcl_somatic_p_raw	cbcl01	cbcl_somatic_p_raw	parent	CBCL Age 6-18 Somatic Problems. See REDCap calculation in hcp_choices_calcs column
			cbcl01-cbcl_thought_raw	cbcl01	cbcl_thought_raw	parent	CBCL Age 6-18 Thought Problems Scale. See REDCap calculation in hcp_choices_calcs column
			cbcl01-cbcl_total_raw	cbcl01	cbcl_total_raw	parent	CBCL Age Age 6-18 Total. See REDCap calculation in hcp_choices_calcs column
			cbcl01-kkwithr	cbcl01	kkwithr	parent	CBCL Age 6-18 Withdrawn / Depressed Scale. See REDCap calculation in hcp_choices_calcs column
		Achenbach Youth Self-Report (YSR; ages 11 - 17)	ysr01-abcl_other_total	ysr01	abcl_other_total	child	YSR Other Problems Scale 12-18
			ysr01-cbcl_adhd	ysr01	cbcl_adhd	child	YSRA Attention Deficit / Hyperactivity Problems T Value 12-18
			ysr01-cbcl_anxiety	ysr01	cbcl_anxiety	child	YSRA Anxiety Problems T Value 12-18
			ysr01-cbcl_conduct	ysr01	cbcl_conduct	child	YSRA Conduct Problems T Value 12-18
			ysr01-cbcl_external	ysr01	cbcl_external	child	YSR External T Value 12-18
			ysr01-cbcl_internal	ysr01	cbcl_internal	child	YSR Internal T Value 12-18
			ysr01-cbcl_social_p	ysr01	cbcl_social_p	child	YSR Social Problems T Value 12-18
			ysr01-cbcl_total	ysr01	cbcl_total	child	YSR Total T Value 12-18
			ysr01-cbcl_withdrawn_depressed_t_sc	ysr01	cbcl_withdrawn_depressed_t_sc	child	YSR Withdrawn / Depressed T Value 12-18
			ysr01-kkaddr	ysr01	kkaddr	child	YSR DSM-5 Attention Deficit / Hyperactivity Problems
			ysr01-kkaggrr	ysr01	kkaggrr	child	YSR Aggressive Behavior Scale 12-18
			ysr01-kkanxdr	ysr01	kkanxdr	child	YSR Anxious / Depressed Scale 12-18
			ysr01-kkanxr	ysr01	kkanxr	child	YSR DSM-5 Anxiety Problems
			ysr01-kkattnr	ysr01	kkattnr	child	YSR Attention Problems Scale 12-18
			ysr01-kkcdr	ysr01	kkcdr	child	YSR DSM-5 Conduct Problems
			ysr01-kkdepr	ysr01	kkdepr	child	YSR DSM-5 Depressive Problems
			ysr01-kkextr	ysr01	kkextr	child	YSR External (B) 12-18
			ysr01-kkintr	ysr01	kkintr	child	YSR Internal (A) 12-18
			ysr01-kkoddr	ysr01	kkoddr	child	YSR DSM-5 Oppositional Defiant Problems
			ysr01-kksocpr	ysr01	kksocpr	child	YSR Social Problems Scale 12-18
			ysr01-kksomar	ysr01	kksomar	child	YSR Somatic Complaints Scale 12-18
			ysr01-kksomr	ysr01	kksomr	child	YSR DSM-5 Somatic Problems
			ysr01-kkthotr	ysr01	kkthotr	child	YSR Thought Problems Scale 12-18
			ysr01-kkwithr	ysr01	kkwithr	child	YSR Withdrawn/Depressed Scale 12-18
			ysr01-somatic_t_score	ysr01	somatic_t_score	child	YSR Somatic Complaints T Value 12-18
			ysr01-thought_t_score	ysr01	thought_t_score	child	YSR Thought Problems T Value 12-18
			ysr01-ysra_c_scale	ysr01	ysra_c_scale	child	YSR (C) 12-18
			ysr01-ysra_total_score	ysr01	ysra_total_score	child	YSR Sum_ABC_ 12-18
Sensory Measures	Audition	NIH Toolbox - Words-in-noise Test (ages 5+)	tlbx_sensation01-Audition-winright_ncorr	tlbx_sensation01	winright_ncorr	NIH Toolbox Ipad App	The total number of items correct for the right ear on the Words-in-Noise Test
	Olfaction	NIH Toolbox - Odor Identification Test (ages 5-21 & parents)	tlbx_sensation01-Odor-nih_tlbx_rawscore	tlbx_sensation01	nih_tlbx_rawscore	NIH Toolbox Ipad App	Raw Score for the Odor Identification Test Instrument (Inst) Specified
	Pain	NIH Toolbox - Pain Interference Survey (ages 18+)	tlbx_sensation01-Pain_Inf-nih_tlbx_rawscore	tlbx_sensation01	nih_tlbx_rawscore	NIH Toolbox Ipad App	Raw Score for the Odor Identification Test Instrument (Inst) Specified
	Pain	NIH Toolbox - Pain Intensity Survey (ages 18+)	tlbx_sensation01-Pain_Inten-nih_tlbx_rawscore	tlbx_sensation01	nih_tlbx_rawscore	NIH Toolbox Ipad App	Raw Score for the Odor Identification Test Instrument (Inst) Specified
	Vision	NIH Toolbox - Visual Acuity Test (ages 5+)	tlbx_sensation01-Visual-raw_vat	tlbx_sensation01	raw_vat	NIH Toolbox Ipad App	Raw Score for the Visual Acuity Instrument (Inst) Specified
Subject Information	Handedness	11-item Edinburgh Handedness questionnaire	edinburgh_hand01-handedness_score	edinburgh_hand01	handedness_score	child	Score: The score is the total number of activities carried out with each hand where a right-handed response is give a 1 and a left-handed response is given a 0.
Substance Use	Tobacco, Alcohol, and Substance Use	NIDA Substance Abuse and Alcohol Core (ages 12-21 and parents)	phenx_su01-alc_30day_freq	phenx_su01	alc_30day_freq	teen/child	ALCOHOL USE: 3. Think specifically about the past 30 days, up to and including today. During the past 30 days, on how many days did you drink one or more drinks of an alcoholic beverage?
			phenx_su01-alc_30day_quantity	phenx_su01	alc_30day_quantity	teen/child	ALCOHOL USE: 4. On the days that you drank during the past 30 days, how many drinks did you usually have each day? Count as a drink a can or bottle of beer; a wine cooler or a glass of wine, champagne, or sherry; a shot of liquor or a mixed drink or cocktail.
			phenx_su01-alc_first_use_age	phenx_su01	alc_first_use_age	teen/child	ALCOHOL USE: 2. About how old were you when you first started drinking, not counting small tastes or sips of alcohol?
			phenx_su01-alc_lifetime_use	phenx_su01	alc_lifetime_use	teen/child	ALCOHOL USE: 1. In your entire life, have you had at least 1 drink of any kind of alcohol, not counting small tastes or sips? Definition of a standard drink: 1 12oz bottle of beer, 1 glass 4oz non-fortified wine, 1 mixed drink with 1oz liquor. 1=Yes; 2=No; 999: "Don't know/Refused"
			phenx_su01-ale_affect_sum	phenx_su01	ale_affect_sum	teen/child	How Much Affected - Sum Validation: No Minimum sum([ple_died_fu2_y], [ple_injured_fu2_y], [ple_crime_fu2_y], [ple_friend_fu2_y], [ple_friend_injur_fu2_y], [ple_financial_fu2_y], [ple_sud_fu2_y], [ple_ill_fu2_y], [ple_injur_fu2_y], [ple_argue_fu2_y], [ple_job_fu2_y], [ple_away_fu2_y], [ple_arrest_fu2_y], [ple_friend_died_fu2_y], [ple_mh_fu2_y], [ple_sib_fu2_y], [ple_victim_fu2_y], [ple_separ_fu2_y…
			phenx_su01-ale_affected_bad_mean	phenx_su01	ale_affected_bad_mean	teen/child	How Much Affected Bad - Mean Validation: No Minimum [ple_y_ss_affected_bad_sum] / [ple_y_ss_total_bad]
			phenx_su01-ale_affected_bad_sum	phenx_su01	ale_affected_bad_sum	teen/child	How Much Affected Bad - Sum Validation: No Minimum
			phenx_su01-ale_affected_good_mean	phenx_su01	ale_affected_good_mean	teen/child	How Much Affected Good - Mean Validation: No Minimum [ple_y_ss_affected_good_sum] / [ple_y_ss_total_good]
			phenx_su01-ale_affected_good_sum	phenx_su01	ale_affected_good_sum	teen/child	How Much Affected Good - Sum Validation: No Minimum if([ple_died_fu_y] = '1',[ple_died_fu2_y],0) + if([ple_injured_fu_y] = '1',[ple_injured_fu2_y],0) + if([ple_crime_fu_y]= '1',[ple_crime_fu2_y],0) + if([ple_friend_fu_y]= '1',[ple_friend_fu2_y],0) + if([ple_friend_injur_fu_y] = '1',[ple_friend_injur_fu2_y],0) + if([ple_financial_fu_y] = '1',[ple_financial_fu2_y],0) + if([ple_sud_fu_y]= '1',[ple_s…
			phenx_su01-ale_total_bad	phenx_su01	ale_total_bad	teen/child	Total Number of Bad Events, Validation: No Minimum if([ple_died_fu_y] = '2',1,0) + if([ple_injured_fu_y] = '2',1,0) + if([ple_crime_fu_y]= '2',1,0) + if([ple_friend_fu_y]= '2',1,0) + if([ple_friend_injur_fu_y]= '2',1,0) + if([ple_financial_fu_y]= '2',1,0) + if([ple_sud_fu_y]= '2',1,0) + if([ple_ill_fu_y]= '2',1,0) + if([ple_injur_fu_y]= '2',1,0) + if([ple_argue_fu_y]= '2',1,0) + if([ple_job_fu_y]…
			phenx_su01-ale_total_good	phenx_su01	ale_total_good	teen/child	Total Number of Good Events, Validation: No Minimum if([ple_died_fu_y] = '1',1,0) + if([ple_injured_fu_y] = '1',1,0) + if([ple_crime_fu_y]= '1',1,0) + if([ple_friend_fu_y]= '1',1,0) + if([ple_friend_injur_fu_y]= '1',1,0) + if([ple_financial_fu_y]= '1',1,0) + if([ple_sud_fu_y]= '1',1,0) + if([ple_ill_fu_y]= '1',1,0) + if([ple_injur_fu_y]= '1',1,0) + if([ple_argue_fu_y]= '1',1,0) + if([ple_job_fu_y…
			phenx_su01-ale_total_number	phenx_su01	ale_total_number	teen/child	Total Number of Events, Validation: No Minimum sum([ple_died_y], [ple_injured_y], [ple_crime_y], [ple_friend_y], [ple_friend_injur_y], [ple_financial_y], [ple_sud_y], [ple_ill_y], [ple_injur_y], [ple_argue_y], [ple_job_y], [ple_away_y], [ple_arrest_y], [ple_friend_died_y], [ple_mh_y], [ple_sib_y], [ple_victim_y], [ple_separ_y], [ple_law_y], [ple_school_y], [ple_move_y], [ple_jail_y], [ple_step_y]…
			phenx_su01-attended_new_school_aff	phenx_su01	attended_new_school_aff	teen/child	19.2. How much did the event affect you? 1=Not at all; 2= A little; 3=Some; 4=A lot; 5=Not applicable; 6=Don't know
			phenx_su01-attended_new_school_exp	phenx_su01	attended_new_school_exp	teen/child	19.1. Was this a good or bad experience? 1=Mostly good; 2=Mostly bad;3=Not applicable; 4=Don't Know
			phenx_su01-fam_mem_died_aff	phenx_su01	fam_mem_died_aff	teen/child	1.2. How much did the event affect you? 1=Not at all; 2= A little; 3=Some; 4=A lot; 5=Not applicable; 6=Don't know
			phenx_su01-fam_mem_died_exp	phenx_su01	fam_mem_died_exp	teen/child	1.1. Was this a good or bad experience? 1=Mostly good; 2=Mostly bad;3=Not applicable; 4=Don't Know
			phenx_su01-fam_mem_injured_aff	phenx_su01	fam_mem_injured_aff	teen/child	2.2. How much did the event affect you? 1=Not at all; 2= A little; 3=Some; 4=A lot; 5=Not applicable; 6=Don't know
			phenx_su01-fam_mem_injured_exp	phenx_su01	fam_mem_injured_exp	teen/child	2.1. Was this a good or bad experience? 1=Mostly good; 2=Mostly bad;3=Not applicable; 4=Don't Know
			phenx_su01-first_use_age_marijuana	phenx_su01	first_use_age_marijuana	teen/child	SUBSTANCE USE: 5A. How old were you when you FIRST used marijuana?
			phenx_su01-frquency_marijuana_code	phenx_su01	frquency_marijuana_code	teen/child	SUBSTANCE USE: 5B. Think specifically about the past 30 days, up to and including today. During the past 30 days, on how many days did you use marijuana? 99=Don't Know/Refused
			phenx_su01-nida_y_tobaco_type	phenx_su01	nida_y_tobaco_type	teen/child	TOBACCO USE: Interpreting responses to assess smoking status: * If answer to Question 1 is "No", then respondent is a "Never Smoker". * If answer to Question 1 is "Yes" and answer to Question 2 is "Every day", then respondent is a "Current Every-Day Smoker". * If answer to Question 1 is "Yes" and answer to Question 2 is "Some days", then respondent is a "Current Some-Day Smoker". * If answer to Q…

## Sheet: hcpd_behavior_pattern_ext
variablie name used in the study	partial spearman correlation coefficient (age,site as confounders)	partial spearman correlation p value (age,,site as confounders)	number of involving subjects	age range (months)	hcp_descirption	nda_descirption	hcp_source	nda_structure	nda_element
asr01-adh_total	0.234514	0.00399241	149	216-263	5. AD/H Problems Total:	5. AD/H Problems Total:	teen/child	asr01	adh_total
asr01-adh_h_i_total	0.222196	0.00645872	149	216-263	Attention Deficit/Hyperactivity Problems Subscales: Hyperactivity-Impulsivity (H-I) Total:	Attention Deficit/Hyperactivity Problems Subscales: Hyperactivity-Impulsivity (H-I) Total:	teen/child	asr01	adh_h_i_total
asr01-adh_i_total	0.203259	0.0129111	149	216-263	Attention Deficit/Hyperactivity Problems Subscales: Inattention (I) Total:	Attention Deficit/Hyperactivity Problems Subscales: Inattention (I) Total:	teen/child	asr01	adh_i_total
prang01-AngPhysAgg-anger_rs	0.187117	0.0433703	117	216-263	Raw Score for Instrument (Inst) specified	Raw Score for Instrument (Inst) specified	NIH Toolbox Ipad App	prang01	anger_rs
asr01-attention_problems_total	0.181067	0.0271127	149	216-263	Attention Problems Syndrome Score	Attention Problems Syndrome Score	teen/child	asr01	attention_problems_total
screentime01-self-screentime13_y	0.180835	5.76728e-06	621	97-263	3. How often do you play mature-rated video games (e.g., Call of Duty, Grand Theft Auto, Assassin's Creed, etc.)? 0 = Never ; 1 = Once in a while ; 2 = Regularly ; 3 = All the time	3. How often do you play mature-rated video games (e.g., Call of Duty, Grand Theft Auto, Assassin's Creed, etc.)? 0 = Never ; 1 = Once in a while ; 2 = Regularly ; 3 = All the time	teen/child	screentime01	screentime13_y
asr01-abcl_critical_total	0.173865	0.0339556	149	216-263	Critical Items Syndrome Score	Critical Items Syndrome Score	teen/child	asr01	abcl_critical_total
asr01-externalizing_problems_total	0.167858	0.0407312	149	216-263	External Syndrome Score	External Syndrome Score	teen/child	asr01	externalizing_problems_total
asr01-asr_syn_csum	0.165132	0.0441617	149	216-263	C Sum Syndrome Score	C Sum Syndrome Score	teen/child	asr01	asr_syn_csum
saiq01-ccf_sai_p_soc_nmonth	0.134474	0.0494612	214	97-213	Soccer: During the most active period, about how many months per year did your child participate in this activity? 0 = Don't know ; 1 = 1 ; 2 = 2 ; 3 = 3 ; 4 = 4 ; 5 = 5 ; 6 = 6 ; 7 = 7 ; 8 = 8 ; 9 = 9 ; 10 = 10 ; 11 = 11 ; 12 = 12	Soccer: During the most active period, about how many months per year did your child participate in this activity? 0 = Don't know ; 1 = 1 ; 2 = 2 ; 3 = 3 ; 4 = 4 ; 5 = 5 ; 6 = 6 ; 7 = 7 ; 8 = 8 ; 9 = 9 ; 10 = 10 ; 11 = 11 ; 12 = 12	parent	saiq01	ccf_sai_p_soc_nmonth
psm01-PicSeqMemo-nih_picseq_unadjusted	0.129358	0.00605208	449	97-263	Uncorrected Standard score for the Picture Sequence Memory Test Instrument (Inst) specified	Uncorrected Standard score for the Picture Sequence Memory Test Instrument (Inst) specified	NIH Toolbox Ipad App	psm01	nih_picseq_unadjusted
self_effic01-self-nih_tlbx_rawscore	0.11272	0.0166297	451	97-263	Raw Score for the Self-Efficacy Instrument (Inst) Specified	Raw Score for the Self-Efficacy Instrument (Inst) Specified	NIH Toolbox Ipad App	self_effic01	nih_tlbx_rawscore
tlbx_motor01-Strength-grip_standardsc_dom	0.111756	0.0170904	455	97-263	Grip Strength Test Uncorrected Standard Scores Dominant hand	Grip Strength Test Uncorrected Standard Scores Dominant hand	NIH Toolbox Ipad App	tlbx_motor01	grip_standardsc_dom
screentime01-self-screentime9_wknd_y	0.104547	0.00912836	621	97-263	2. On a typical weekend day, how many hours do you: Play video games on a computer, console, phone or other device (Xbox, Play Station, iPad)? 0 = None ; 0.25 = < 30 minutes ; 0.5 = 30 minutes ; 1 = 1 hour ; 2 = 2 hours ; 3 = 3 hours ; 4 = 4+ hours - partial times are rounded down	2. On a typical weekend day, how many hours do you: Play video games on a computer, console, phone or other device (Xbox, Play Station, iPad)? 0 = None ; 0.25 = < 30 minutes ; 0.5 = 30 minutes ; 1 = 1 hour ; 2 = 2 hours ; 3 = 3 hours ; 4 = 4+ hours - partial times are rounded down	teen/child	screentime01	screentime9_wknd_y
tlbx_motor01-Strength-nih_tlbx_domsc	0.104431	0.0269155	449	97-263	9-Hole Pegboard Dexterity Test Dominant Score	9-Hole Pegboard Dexterity Test Dominant Score	NIH Toolbox Ipad App	tlbx_motor01	nih_tlbx_domsc
lswmt01-ListSort_WM-uss	0.096814	0.040535	448	97-263	List Sorting Working Memory Test Uncorrected Standard Score for Instrument(Inst) specified	List Sorting Working Memory Test Uncorrected Standard Score for Instrument(Inst) specified	NIH Toolbox Ipad App	lswmt01	uss
phenx_su01-nida_y_tobaco_type	0.0965014	0.0452549	431	144-263	TOBACCO USE: Interpreting responses to assess smoking status: * If answer to Question 1 is "No", then respondent is a "Never Smoker". * If answer to Question 1 is "Yes" and answer to Question 2 is "Every day", then respondent is a "Current Every-Day Smoker". * If answer to Question 1 is "Yes" and answer to Question 2 is "Some days", then respondent is a "Current Some-Day Smoker". * If answer to Q…	TOBACCO USE: Interpreting responses to assess smoking status: * If answer to Question 1 is "No", then respondent is a "Never Smoker". * If answer to Question 1 is "Yes" and answer to Question 2 is "Every day", then respondent is a "Current Every-Day Smoker". * If answer to Question 1 is "Yes" and answer to Question 2 is "Some days", then respondent is a "Current Some-Day Smoker". * If answer to Q…	teen/child	phenx_su01	nida_y_tobaco_type
cogcomp01-nih_eccogcomp_unadjusted	0.096294	0.0418595	447	97-263	Early Child Cognition Composite Score unadjusted	Early Child Cognition Composite Score unadjusted	NIH Toolbox Ipad App	cogcomp01	nih_eccogcomp_unadjusted
screentime01-self-screentime3_wkdy_y	0.0852701	0.0334845	622	97-263	1. On a typical weekday, how many hours do you: Play video games on a computer, console, phone or other device (Xbox, Play Station, iPad)? 0 = None ; 0.25 = < 30 minutes ; 0.5 = 30 minutes ; 1 = 1 hour ; 2 = 2 hours ; 3 = 3 hours ; 4 = 4+ hours - partial times are rounded down	1. On a typical weekday, how many hours do you: Play video games on a computer, console, phone or other device (Xbox, Play Station, iPad)? 0 = None ; 0.25 = < 30 minutes ; 0.5 = 30 minutes ; 1 = 1 hour ; 2 = 2 hours ; 3 = 3 hours ; 4 = 4+ hours - partial times are rounded down	teen/child	screentime01	screentime3_wkdy_y
upps01-self-upps_posu	0.0842463	0.0356755	622	97-263	Positive urgency	Positive urgency	parent	upps01	upps_posu
upps01-self-senseek_score	0.0816101	0.041886	622	97-263	Sensation seeking	Sensation seeking	parent	upps01	senseek_score
er4001-er40_c_cr	-0.0869169	0.0303346	621	97-263	ER40 Correct Responses	ER40 Correct Responses	PennCNP	er4001	er40_c_cr
bisbas01-self-bas_rr	-0.089007	0.026313	623	97-263	BAS Reward Responsiveness: child report	BAS Reward Responsiveness: child report	child	bisbas01	bas_rr
bisbas01-self-bissc_total	-0.106493	0.0078074	623	97-263	BIS Total Score: child report	BIS Total Score: child report	child	bisbas01	bissc_total
tlbx_fearanx01-Fear-nih_tlbx_rawscore	-0.110941	0.040911	340	97-214	Raw Score for the Instrument (Inst) Specified	Raw Score for the Instrument (Inst) Specified	NIH Toolbox Ipad App	tlbx_fearanx01	nih_tlbx_rawscore
er4001-er40_c_fpart	-0.145857	0.0283587	226	97-263	Median Response Time for ER40 False Positive Anger Responses (ms)	Median Response Time for ER40 False Positive Anger Responses (ms)	PennCNP	er4001	er40_c_fpart
saiq01-ccf_sai_p_basket_tspent	-0.162445	0.0485411	148	100-214	Basketball: During the most active period, about how many minutes per session did your child participate in this activity? 0 = Don't know ; 1 = less than 30 minutes ; 2 = 30 ; 3 = 45 ; 4 = 60 (1 hr) ; 5 = 90 (1.5 hrs) ; 6 = 120 (2 hrs) ; 7 = 150 (2.5 hrs) ; 8 = 180 (3 hrs) ; 9 = greater than 3 hours	Basketball: During the most active period, about how many minutes per session did your child participate in this activity? 0 = Don't know ; 1 = less than 30 minutes ; 2 = 30 ; 3 = 45 ; 4 = 60 (1 hr) ; 5 = 90 (1.5 hrs) ; 6 = 120 (2 hrs) ; 7 = 150 (2.5 hrs) ; 8 = 180 (3 hrs) ; 9 = greater than 3 hours	parent	saiq01	ccf_sai_p_basket_tspent
nffi01-neo2_score_ag	-0.180612	0.0064776	226	192-263	Agreeableness (A): See REDCap calculation in hcp_choices_calcs column 4,9r,14r,19,24r,29r,34,39r,44r,49,54r,59r	Agreeableness (A): See REDCap calculation in hcp_choices_calcs column 4,9r,14r,19,24r,29r,34,39r,44r,49,54r,59r	teen/child	nffi01	neo2_score_ag
nffi01-neo2_score_co	-0.244542	0.000205292	226	192-263	Conscientiousness (C): See REDCap calculation in hcp_choices_calcs column 5,10,15r,20,25,30r,35,40,45r,50,55r,60	Conscientiousness (C): See REDCap calculation in hcp_choices_calcs column 5,10,15r,20,25,30r,35,40,45r,50,55r,60	teen/child	nffi01	neo2_score_co

## Sheet: hcpd_behavior_pattern_cog
variablie name used in the study	partial spearman correlation coefficient (age, sex,site as confounders)	partial spearman correlation p value (age, sex,site as confounders)	number of involving subjects	age range (months)	hcp_descirption	nda_descirption	hcp_source	nda_structure	nda_element
tlbx_wellbeing01-GenLifeSatisf_CAT-nih_tlbx_rawscore	0.292818	0.00101367	123	156-214	Raw Score for the Instrument (Inst) Specified	Raw Score for the Instrument (Inst) Specified	NIH Toolbox Ipad App	tlbx_wellbeing01	nih_tlbx_rawscore
psqi01-psqip4	0.256274	0.00160644	149	216-263	4. During the past month, how many hours of actual sleep did you get at night? (This may be different than the number of hours you spend in bed.) HOURS OF SLEEP PER NIGHT:________	4. During the past month, how many hours of actual sleep did you get at night? (This may be different than the number of hours you spend in bed.) HOURS OF SLEEP PER NIGHT:________	teen	psqi01	psqip4
saiq01-ccf_sai_p_basket_nyr	0.251062	0.00201225	149	100-214	Basketball: For how many years did your child participate in this activity? 0 = Don't know ; 1 = 1 ; 2 = 2 ; 3 = 3 ; 4 = 4 ; 5 = 5 ; 6 = 6 ; 7 = 7 ; 8 = 8 ; 9 = 9 ; 10 = 10	Basketball: For how many years did your child participate in this activity? 0 = Don't know ; 1 = 1 ; 2 = 2 ; 3 = 3 ; 4 = 4 ; 5 = 5 ; 6 = 6 ; 7 = 7 ; 8 = 8 ; 9 = 9 ; 10 = 10	parent	saiq01	ccf_sai_p_basket_nyr
tlbx_motor01-Dexterity-grip_standardsc_dom	0.238619	2.59793e-07	455	97-263	Grip Strength Test Uncorrected Standard Scores Dominant hand	Grip Strength Test Uncorrected Standard Scores Dominant hand	NIH Toolbox Ipad App	tlbx_motor01	grip_standardsc_dom
cogcomp01-nih_totalcogcomp_unadjusted	0.237467	3.78623e-07	447	97-263	Total Cognition Composite Score unadjusted	Total Cognition Composite Score unadjusted	NIH Toolbox Ipad App	cogcomp01	nih_totalcogcomp_unadjusted
cogcomp01-nih_eccogcomp_unadjusted	0.236263	4.35199e-07	447	97-263	Early Child Cognition Composite Score unadjusted	Early Child Cognition Composite Score unadjusted	NIH Toolbox Ipad App	cogcomp01	nih_eccogcomp_unadjusted
cogcomp01-nih_crycogcomp_unadjusted	0.223161	1.93779e-06	446	97-263	Crystal Cognition Composite Score unadjusted	Crystal Cognition Composite Score unadjusted	NIH Toolbox Ipad App	cogcomp01	nih_crycogcomp_unadjusted
saiq01-ccf_sai_p_drama_nyr	0.208697	0.0362253	101	97-213	Drama, Theater, Acting, Film: For how many years did your child participate in this activity? 0 = Don't know ; 1 = 1 ; 2 = 2 ; 3 = 3 ; 4 = 4 ; 5 = 5 ; 6 = 6 ; 7 = 7 ; 8 = 8 ; 9 = 9 ; 10 = 10	Drama, Theater, Acting, Film: For how many years did your child participate in this activity? 0 = Don't know ; 1 = 1 ; 2 = 2 ; 3 = 3 ; 4 = 4 ; 5 = 5 ; 6 = 6 ; 7 = 7 ; 8 = 8 ; 9 = 9 ; 10 = 10	parent	saiq01	ccf_sai_p_drama_nyr
tlbx_sensation01-Odor-nih_tlbx_rawscore	0.194584	2.86633e-05	456	97-263	Raw Score for the Odor Identification Test Instrument (Inst) Specified	Raw Score for the Odor Identification Test Instrument (Inst) Specified	NIH Toolbox Ipad App	tlbx_sensation01	nih_tlbx_rawscore
deldisk01-PennCNP-auc_40000	0.187887	2.70795e-06	615	97-263	Area Under the Curve for Delay Amount $40000	Area Under the Curve for Delay Amount $40000	PennCNP	deldisk01	auc_40000
cogcomp01-nih_fluidcogcomp_unadjusted	0.179799	0.000132416	447	97-263	Fluid Cognition Composite Score unadjusted	Fluid Cognition Composite Score unadjusted	NIH Toolbox Ipad App	cogcomp01	nih_fluidcogcomp_unadjusted
socdem01-annual_fam_inc	0.175128	2.74849e-05	567	97-263	SUBJECT: The last year that you were living at home with your family (which might be this year), what was your family income? -999999 = Don't know or don't want to say	SUBJECT: The last year that you were living at home with your family (which might be this year), what was your family income? -999999 = Don't know or don't want to say	teen	socdem01	annual_fam_inc
tlbx_motor01-Endurance-raw_wet	0.17509	0.000227271	439	97-263	2-Minute Walk Endurance Test Raw Score	2-Minute Walk Endurance Test Raw Score	NIH Toolbox Ipad App	tlbx_motor01	raw_wet
dccs01-DimChangeCardSort-nih_dccs_unadjusted	0.172549	0.000242996	448	97-263	Uncorrected standard score for DCCS Instrument (Inst) specified	Uncorrected standard score for DCCS Instrument (Inst) specified	NIH Toolbox Ipad App	dccs01	nih_dccs_unadjusted
orrt01-OraReadRecg-tbx_reading_score	0.169063	0.000325275	448	97-263	Uncorrected Standard score for the Oral Reading Recognition Test Instrument (Inst) specified	Uncorrected Standard score for the Oral Reading Recognition Test Instrument (Inst) specified	NIH Toolbox Ipad App	orrt01	tbx_reading_score
eatq01-self-eatq_ypls	0.168851	0.00128104	361	108-191	[child report] Pleasure Sensitivity, N=5, Alpha=.78, correlation w/long form=.96 4, 16, 23, 33, 65. See REDCap calculation in hcp_choices_calcs column	[child report] Pleasure Sensitivity, N=5, Alpha=.78, correlation w/long form=.96 4, 16, 23, 33, 65. See REDCap calculation in hcp_choices_calcs column	child	eatq01	eatq_ypls
eatq01-self-eatq_yspr_aff	0.162783	0.00191647	361	108-191	[child report] Superscales/factors - d) Affiliativeness: Affiliation, Perceptual Sensitivity, Pleasure Sensitivity. See REDCap calculation in hcp_choices_calcs column	[child report] Superscales/factors - d) Affiliativeness: Affiliation, Perceptual Sensitivity, Pleasure Sensitivity. See REDCap calculation in hcp_choices_calcs column	child	eatq01	eatq_yspr_aff
deldisk01-PennCNP-auc_200	0.160501	6.38403e-05	615	97-263	Area Under the Curve for Delay Amount $200	Area Under the Curve for Delay Amount $200	PennCNP	deldisk01	auc_200
wais_iv_part101-scoring_matrixreasoning_raw	0.156402	0.0387423	175	204-263	WAIS-IV Matrix Reasoning Raw Score	WAIS-IV Matrix Reasoning Raw Score	qint	wais_iv_part101	scoring_matrixreasoning_raw
wisc_v01-matrix_completion	0.155875	0.00215998	385	97-203	WISC-V Matrix Reasoning Completion Time (seconds)	WISC-V Matrix Reasoning Completion Time (seconds)	qint	wisc_v01	matrix_completion
eatq01-self-eatq_ic	0.155513	0.00305109	361	108-191	[child report] Inhibitory Control, N=5, Alpha=.69, correlation w/long form=.93 10R, 14, 26R, 43, 63 . See REDCap calculation in hcp_choices_calcs column	[child report] Inhibitory Control, N=5, Alpha=.69, correlation w/long form=.93 10R, 14, 26R, 43, 63 . See REDCap calculation in hcp_choices_calcs column	child	eatq01	eatq_ic
socdem01-cg1_ustime	0.155494	0.000681038	474	97-214	CAREGIVER: How many years have you lived in the United States:	CAREGIVER: How many years have you lived in the United States:	parent	socdem01	cg1_ustime
socdem01-preg_age_mom	0.153106	0.000150747	608	97-263	SUBJECT: How old in years was your biological mother when you were born?	SUBJECT: How old in years was your biological mother when you were born?	teen	socdem01	preg_age_mom
eatq01-self-eatq_yspr_sur	0.149676	0.00437111	361	108-191	[child report] Superscales/factors - b) Surgency = High Intensity Pleasure, Fear (reverse scored), Shyness (reverse scored). See REDCap calculation in hcp_choices_calcs column	[child report] Superscales/factors - b) Surgency = High Intensity Pleasure, Fear (reverse scored), Shyness (reverse scored). See REDCap calculation in hcp_choices_calcs column	child	eatq01	eatq_yspr_sur
eatq01-self-eatq_yspr_eff	0.148214	0.00477402	361	108-191	[child report] Superscales/factors - a) Effortful Control = Attention, Inhibitory Control, Activation Control. See REDCap calculation in hcp_choices_calcs column	[child report] Superscales/factors - a) Effortful Control = Attention, Inhibitory Control, Activation Control. See REDCap calculation in hcp_choices_calcs column	child	eatq01	eatq_yspr_eff
upps01-caregiver-premed_score	0.147961	0.0030881	398	97-192	Lack of Premeditation	Lack of Premeditation	parent	upps01	premed_score
sleepdis01-sleepdisturb_arsal	0.142058	0.0356495	219	97-155	Sleep Scale for Childen Scores: Disorders of arousal	Sleep Scale for Childen Scores: Disorders of arousal	parent	sleepdis01	sleepdisturb_arsal
mmse01-att_calc_tot	0.140694	0.00992756	335	168-263	Sum of 3A. ATTENTION AND CALCULATION Counting Backwards Test. Ask the subject to begin with 100 and count backwards by 7. Record each response. Check one box at right for each correct response. Any response 7 or less than the previous response is a correct response. The score is the number of correct subtractions. Sum of correct (Maximum Score = 5).	Sum of 3A. ATTENTION AND CALCULATION Counting Backwards Test. Ask the subject to begin with 100 and count backwards by 7. Record each response. Check one box at right for each correct response. Any response 7 or less than the previous response is a correct response. The score is the number of correct subtractions. Sum of correct (Maximum Score = 5).	teen/child	mmse01	att_calc_tot
sleepdis01-sleepdisturb_trans	0.140532	0.0376991	219	97-155	Sleep Scale for Childen Scores: Sleep-Wake Transition Disorders	Sleep Scale for Childen Scores: Sleep-Wake Transition Disorders	parent	sleepdis01	sleepdisturb_trans
self_effic01-self-nih_tlbx_rawscore	0.137338	0.00347372	451	97-263	Raw Score for the Self-Efficacy Instrument (Inst) Specified	Raw Score for the Self-Efficacy Instrument (Inst) Specified	NIH Toolbox Ipad App	self_effic01	nih_tlbx_rawscore
lswmt01-ListSort_WM-uss	0.132896	0.00483959	448	97-263	List Sorting Working Memory Test Uncorrected Standard Score for Instrument(Inst) specified	List Sorting Working Memory Test Uncorrected Standard Score for Instrument(Inst) specified	NIH Toolbox Ipad App	lswmt01	uss
tlbx_sensation01-Visual-raw_vat	0.130455	0.00522031	457	97-263	Raw Score for the Visual Acuity Instrument (Inst) Specified	Raw Score for the Visual Acuity Instrument (Inst) Specified	NIH Toolbox Ipad App	tlbx_sensation01	raw_vat
tlbx_motor01-Dexterity-ninehole_pctl_nondom	0.126067	0.046013	251	97-263	9-Hole Pegboard Dexterity Test National Percentile (age adjusted) Non-Dominant hand	9-Hole Pegboard Dexterity Test National Percentile (age adjusted) Non-Dominant hand	NIH Toolbox Ipad App	tlbx_motor01	ninehole_pctl_nondom
saiq01-ccf_sai_p_music_nyr	0.122096	0.0404709	282	97-214	Musical Instrument(Singing, Choir, Guitar, Piano, Drums, Violin, Flute, Band, Rock Band, Orchestra): For how many years did your child participate in this activity? 0 = Don't know ; 1 = 1 ; 2 = 2 ; 3 = 3 ; 4 = 4 ; 5 = 5 ; 6 = 6 ; 7 = 7 ; 8 = 8 ; 9 = 9 ; 10 = 10	Musical Instrument(Singing, Choir, Guitar, Piano, Drums, Violin, Flute, Band, Rock Band, Orchestra): For how many years did your child participate in this activity? 0 = Don't know ; 1 = 1 ; 2 = 2 ; 3 = 3 ; 4 = 4 ; 5 = 5 ; 6 = 6 ; 7 = 7 ; 8 = 8 ; 9 = 9 ; 10 = 10	parent	saiq01	ccf_sai_p_music_nyr
eatq01-self-eatq_ypers	0.121093	0.0213764	361	108-191	[child report] Perceptual Sensitivity, N=4, Alpha=.71, correlation w/long form=.90 6, 12, 21, 24. See REDCap calculation in hcp_choices_calcs column	[child report] Perceptual Sensitivity, N=4, Alpha=.71, correlation w/long form=.90 6, 12, 21, 24. See REDCap calculation in hcp_choices_calcs column	child	eatq01	eatq_ypers
socdem01-preg_age_dad	0.121052	0.00315256	593	97-263	SUBJECT: How old in years was your biological father when you were born?	SUBJECT: How old in years was your biological father when you were born?	teen	socdem01	preg_age_dad
psm01-PicSeqMemo-nih_picseq_unadjusted	0.120315	0.0107228	449	97-263	Uncorrected Standard score for the Picture Sequence Memory Test Instrument (Inst) specified	Uncorrected Standard score for the Picture Sequence Memory Test Instrument (Inst) specified	NIH Toolbox Ipad App	psm01	nih_picseq_unadjusted
eatq01-caregiver-eatq_p_ss_inhibitory	0.117369	0.0139779	438	108-214	[parent report] Inhibitory sum(eatq_phenx_turn_taking_p, eatq_phenx_open_present_p, eatq_phenx_impulse_p, eatq_phenx_laugh_control_p, eatq_phenx_stick_to_plan_p) Validation: Maximum of 1 item missing. See REDCap calculation in hcp_choices_calcs column	[parent report] Inhibitory sum(eatq_phenx_turn_taking_p, eatq_phenx_open_present_p, eatq_phenx_impulse_p, eatq_phenx_laugh_control_p, eatq_phenx_stick_to_plan_p) Validation: Maximum of 1 item missing. See REDCap calculation in hcp_choices_calcs column	parent	eatq01	eatq_p_ss_inhibitory
socdem01-ptner_yn	0.115688	0.0117178	474	97-214	CAREGIVER: Do you have a PARTNER?	CAREGIVER: Do you have a PARTNER?	parent	socdem01	ptner_yn
eatq01-self-eatq_ac	0.114461	0.0296779	361	108-191	[child report] Activation Control, N=5, Alpha=.76, correlation w/long form=.96 7R, 18R, 30, 39, 49R. See REDCap calculation in hcp_choices_calcs column	[child report] Activation Control, N=5, Alpha=.76, correlation w/long form=.96 7R, 18R, 30, 39, 49R. See REDCap calculation in hcp_choices_calcs column	child	eatq01	eatq_ac
flanker01-Flanker_IC_Attn-nih_flanker_unadjusted	0.108115	0.0222479	447	97-263	Uncorrected Standard score for Flanker Instrument (Inst) specified	Uncorrected Standard score for Flanker Instrument (Inst) specified	NIH Toolbox Ipad App	flanker01	nih_flanker_unadjusted
eatq01-self-eatq_fear	0.103595	0.0492095	361	108-191	[child report] Fear, N=6, Alpha=.65, original long form scale 32, 35, 40, 46, 51, 57. See REDCap calculation in hcp_choices_calcs column	[child report] Fear, N=6, Alpha=.65, original long form scale 32, 35, 40, 46, 51, 57. See REDCap calculation in hcp_choices_calcs column	child	eatq01	eatq_fear
socdem01-cg1_sub_income	0.102942	0.027433	459	97-214	CAREGIVER: How much did you earn, before taxes and other deductions, during the past 12 months? 1 =Less than $5,000 ; 2 =$5,000 through $11,999 ; 3 =$12,000 through $15,999 ; 4 =$16,000 through $24,999 ; 5 =$25,000 through $34,999 ; 6 =$35,000 through $49,999 ; 7 =$50,000 through $74,999 ; 8 =$75,000 through $99,999 ; 9 =$100,000 through $199,999 ; 10 =$200,000 and greater; 99 = Don't Know; 999 =…	CAREGIVER: How much did you earn, before taxes and other deductions, during the past 12 months? 1 =Less than $5,000 ; 2 =$5,000 through $11,999 ; 3 =$12,000 through $15,999 ; 4 =$16,000 through $24,999 ; 5 =$25,000 through $34,999 ; 6 =$35,000 through $49,999 ; 7 =$50,000 through $74,999 ; 8 =$75,000 through $99,999 ; 9 =$100,000 through $199,999 ; 10 =$200,000 and greater; 99 = Don't Know; 999 =…	parent	socdem01	cg1_sub_income
er4001-er40_c_sad	0.0960635	0.0166381	621	97-263	ER40 Correct Sad Identifications	ER40 Correct Sad Identifications	PennCNP	er4001	er40_c_sad
er4001-er40_d_fc	0.0904075	0.0242579	621	97-263	ER40 Correct Female Identifications	ER40 Correct Female Identifications	PennCNP	er4001	er40_d_fc
er4001-er40_c_cr	0.0823215	0.0402873	621	97-263	ER40 Correct Responses	ER40 Correct Responses	PennCNP	er4001	er40_c_cr
er4001-er40_d_sadrt	-0.0808769	0.0439379	621	97-263	Median Response Time for ER40 Correct Sad Identifications (ms)	Median Response Time for ER40 Correct Sad Identifications (ms)	PennCNP	er4001	er40_d_sadrt
phenx_su01-ale_affected_bad_sum	-0.0819479	0.0412061	621	97-263	How Much Affected Bad - Sum Validation: No Minimum	How Much Affected Bad - Sum Validation: No Minimum	teen/child	phenx_su01	ale_affected_bad_sum
screentime01-self-screentime7_wknd_y	-0.0836489	0.0371626	621	97-263	2. On a typical weekend day, how many hours do you: Watch TV shows or movies? 0 = None ; 0.25 = < 30 minutes ; 0.5 = 30 minutes ; 1 = 1 hour ; 2 = 2 hours ; 3 = 3 hours ; 4 = 4+ hours - partial times are rounded down	2. On a typical weekend day, how many hours do you: Watch TV shows or movies? 0 = None ; 0.25 = < 30 minutes ; 0.5 = 30 minutes ; 1 = 1 hour ; 2 = 2 hours ; 3 = 3 hours ; 4 = 4+ hours - partial times are rounded down	teen/child	screentime01	screentime7_wknd_y
screentime01-self-screentime12_wknd_y	-0.0891114	0.0262573	622	97-263	2. On a typical weekend day, how many hours do you: Video chat (Skype, Facetime, etc.)? 0 = None ; 0.25 = < 30 minutes ; 0.5 = 30 minutes ; 1 = 1 hour ; 2 = 2 hours ; 3 = 3 hours ; 4 = 4+ hours - partial times are rounded down	2. On a typical weekend day, how many hours do you: Video chat (Skype, Facetime, etc.)? 0 = None ; 0.25 = < 30 minutes ; 0.5 = 30 minutes ; 1 = 1 hour ; 2 = 2 hours ; 3 = 3 hours ; 4 = 4+ hours - partial times are rounded down	teen/child	screentime01	screentime12_wknd_y
bisbas01-self-bis_y_ss_basm_rr	-0.0922528	0.0447002	474	97-214	BAS Reward Responsiveness (modified): bisbas8 + bisbas9 + bisbas11 + bisbas12 Validation: All items must be answered: child report	BAS Reward Responsiveness (modified): bisbas8 + bisbas9 + bisbas11 + bisbas12 Validation: All items must be answered: child report	child	bisbas01	bis_y_ss_basm_rr
cbcl01-abcl_other_total	-0.0938348	0.0411475	474	97-214	CBCL Age 6-18 Other Problems Scale. See REDCap calculation in hcp_choices_calcs column	CBCL Age 6-18 Other Problems Scale. See REDCap calculation in hcp_choices_calcs column	parent	cbcl01	abcl_other_total
tlbx_motor01-GaitSpeed-loco_rawscore	-0.0958419	0.0430693	446	97-263	Locomotion - 4 meter walk - Raw Score	Locomotion - 4 meter walk - Raw Score	NIH Toolbox Ipad App	tlbx_motor01	loco_rawscore
fenvs01-caregiver-fes_y_ss_fc	-0.0978998	0.0330954	474	97-214	Conflict Subscale from the Family Environment Scale: RAW Score: ([conflict_p1], [conflict_p2_r], [conflict_p3], [conflict_p4_r], [conflict_p5], [conflict_p6], [conflict_p7_r], [conflict_p8], [conflict_p9_r]) _r indicates reverse scored. Validation: Minimum of 5 items answered	Conflict Subscale from the Family Environment Scale: RAW Score: ([conflict_p1], [conflict_p2_r], [conflict_p3], [conflict_p4_r], [conflict_p5], [conflict_p6], [conflict_p7_r], [conflict_p8], [conflict_p9_r]) _r indicates reverse scored. Validation: Minimum of 5 items answered	teen/child/parent	fenvs01	fes_y_ss_fc
cbcl01-cbcl_conduct_raw	-0.101597	0.02698	474	97-214	CBCL Age 6-18 Conduct Problems Scale. See REDCap calculation in hcp_choices_calcs column	CBCL Age 6-18 Conduct Problems Scale. See REDCap calculation in hcp_choices_calcs column	parent	cbcl01	cbcl_conduct_raw
tlbx_perhost01-PerceHost-nih_tlbx_rawscore	-0.103908	0.0263359	457	97-263	Raw Score for the Perceived Hostility FF Instrument (Inst) Specified	Raw Score for the Perceived Hostility FF Instrument (Inst) Specified	NIH Toolbox Ipad App	tlbx_perhost01	nih_tlbx_rawscore
screentime01-self-screentime1_wkdy_y	-0.105384	0.00858426	621	97-263	1. On a typical weekday, how many hours do you: Watch TV shows or movies? 0 = None ; 0.25 = < 30 minutes ; 0.5 = 30 minutes ; 1 = 1 hour ; 2 = 2 hours ; 3 = 3 hours ; 4 = 4+ hours - partial times are rounded down	1. On a typical weekday, how many hours do you: Watch TV shows or movies? 0 = None ; 0.25 = < 30 minutes ; 0.5 = 30 minutes ; 1 = 1 hour ; 2 = 2 hours ; 3 = 3 hours ; 4 = 4+ hours - partial times are rounded down	teen/child	screentime01	screentime1_wkdy_y
screentime01-self-screentime6_wkdy_y	-0.109252	0.0063829	622	97-263	1. On a typical weekday, how many hours do you: Video chat (Skype, Facetime, etc.)? 0 = None ; 0.25 = < 30 minutes ; 0.5 = 30 minutes ; 1 = 1 hour ; 2 = 2 hours ; 3 = 3 hours ; 4 = 4+ hours - partial times are rounded down	1. On a typical weekday, how many hours do you: Video chat (Skype, Facetime, etc.)? 0 = None ; 0.25 = < 30 minutes ; 0.5 = 30 minutes ; 1 = 1 hour ; 2 = 2 hours ; 3 = 3 hours ; 4 = 4+ hours - partial times are rounded down	teen/child	screentime01	screentime6_wkdy_y
eatq01-self-eatq_fru	-0.109773	0.0370906	361	108-191	[child report] Frustration, N=7, Alpha=.70, correlation w/long form=.95 35, 36, 47, 56, 60, 62, 64. See REDCap calculation in hcp_choices_calcs column	[child report] Frustration, N=7, Alpha=.70, correlation w/long form=.95 35, 36, 47, 56, 60, 62, 64. See REDCap calculation in hcp_choices_calcs column	child	eatq01	eatq_fru
phenx_su01-ale_affected_bad_mean	-0.109817	0.033038	377	97-263	How Much Affected Bad - Mean Validation: No Minimum [ple_y_ss_affected_bad_sum] / [ple_y_ss_total_bad]	How Much Affected Bad - Mean Validation: No Minimum [ple_y_ss_affected_bad_sum] / [ple_y_ss_total_bad]	teen/child	phenx_su01	ale_affected_bad_mean
eatq01-self-eatq_agg	-0.115611	0.0280663	361	108-191	[child report] Aggression, N=6, Alpha=.80, correlation w/long form=.91 5, 9, 13, 22, 50, 58. See REDCap calculation in hcp_choices_calcs column	[child report] Aggression, N=6, Alpha=.80, correlation w/long form=.91 5, 9, 13, 22, 50, 58. See REDCap calculation in hcp_choices_calcs column	child	eatq01	eatq_agg
screentime01-self-screentime11_wknd_y	-0.115879	0.00380423	622	97-263	2. On a typical weekend day, how many hours do you: Visit social networking sites like Facebook, Twitter, Instagram, etc.? 0 = None ; 0.25 = < 30 minutes ; 0.5 = 30 minutes ; 1 = 1 hour ; 2 = 2 hours ; 3 = 3 hours ; 4 = 4+ hours - partial times are rounded down	2. On a typical weekend day, how many hours do you: Visit social networking sites like Facebook, Twitter, Instagram, etc.? 0 = None ; 0.25 = < 30 minutes ; 0.5 = 30 minutes ; 1 = 1 hour ; 2 = 2 hours ; 3 = 3 hours ; 4 = 4+ hours - partial times are rounded down	teen/child	screentime01	screentime11_wknd_y
bisbas01-self-bas_fs	-0.121018	0.00248093	623	97-263	BAS Fun seeking: child report	BAS Fun seeking: child report	child	bisbas01	bas_fs
tlbx_rej01-PercReject-pr_score	-0.121108	0.00955739	457	97-263	Raw Score for the Perceived Rejection Instrument (Inst) Specified	Raw Score for the Perceived Rejection Instrument (Inst) Specified	NIH Toolbox Ipad App	tlbx_rej01	pr_score
tlbx_rej01-self-pr_score	-0.121108	0.00955739	457	97-263	Raw Score for the Perceived Rejection Instrument (Inst) Specified	Raw Score for the Perceived Rejection Instrument (Inst) Specified	NIH Toolbox Ipad App	tlbx_rej01	pr_score
eatq01-self-eatq_yspr_neg	-0.125597	0.0169623	361	108-191	[child report] Superscales/factors - c) Negative Affect = Frustration, Depressive Mood, Aggression. See REDCap calculation in hcp_choices_calcs column	[child report] Superscales/factors - c) Negative Affect = Frustration, Depressive Mood, Aggression. See REDCap calculation in hcp_choices_calcs column	child	eatq01	eatq_yspr_neg
upps01-self-upps_negu	-0.127966	0.00138291	622	97-263	Negative urgency	Negative urgency	parent	upps01	upps_negu
fenvs01-self-fes_y_ss_fc	-0.132423	0.000931034	622	97-263	Conflict Subscale from the Family Environment Scale: RAW Score: ([conflict_p1], [conflict_p2_r], [conflict_p3], [conflict_p4_r], [conflict_p5], [conflict_p6], [conflict_p7_r], [conflict_p8], [conflict_p9_r]) _r indicates reverse scored. Validation: Minimum of 5 items answered	Conflict Subscale from the Family Environment Scale: RAW Score: ([conflict_p1], [conflict_p2_r], [conflict_p3], [conflict_p4_r], [conflict_p5], [conflict_p6], [conflict_p7_r], [conflict_p8], [conflict_p9_r]) _r indicates reverse scored. Validation: Minimum of 5 items answered	teen/child/parent	fenvs01	fes_y_ss_fc
upps01-self-upps_posu	-0.134176	0.00079426	622	97-263	Positive urgency	Positive urgency	parent	upps01	upps_posu
screentime01-caregiver-screentime2_p	-0.134434	0.0033631	474	97-214	2. On a typical WEEKEND DAY, how much TIME does your child spend on a computer, cellphone, tablet, or other electronic device? Please do NOT include time spent on school related work, but do include watching TV, shows or videos, texting or chatting, playing games, or visiting social networking sites (Facebook, Twitter, Instagram). Hours:	2. On a typical WEEKEND DAY, how much TIME does your child spend on a computer, cellphone, tablet, or other electronic device? Please do NOT include time spent on school related work, but do include watching TV, shows or videos, texting or chatting, playing games, or visiting social networking sites (Facebook, Twitter, Instagram). Hours:	parent	screentime01	screentime2_p
screentime01-self-screentime5_wkdy_y	-0.134855	0.000746426	622	97-263	1. On a typical weekday, how many hours do you: Visit social networking sites like Facebook, Twitter, Instagram, etc.? 0 = None ; 0.25 = < 30 minutes ; 0.5 = 30 minutes ; 1 = 1 hour ; 2 = 2 hours ; 3 = 3 hours ; 4 = 4+ hours - partial times are rounded down	1. On a typical weekday, how many hours do you: Visit social networking sites like Facebook, Twitter, Instagram, etc.? 0 = None ; 0.25 = < 30 minutes ; 0.5 = 30 minutes ; 1 = 1 hour ; 2 = 2 hours ; 3 = 3 hours ; 4 = 4+ hours - partial times are rounded down	teen/child	screentime01	screentime5_wkdy_y
saiq01-ccf_sai_p_soc_nmonth	-0.156494	0.0220195	214	97-213	Soccer: During the most active period, about how many months per year did your child participate in this activity? 0 = Don't know ; 1 = 1 ; 2 = 2 ; 3 = 3 ; 4 = 4 ; 5 = 5 ; 6 = 6 ; 7 = 7 ; 8 = 8 ; 9 = 9 ; 10 = 10 ; 11 = 11 ; 12 = 12	Soccer: During the most active period, about how many months per year did your child participate in this activity? 0 = Don't know ; 1 = 1 ; 2 = 2 ; 3 = 3 ; 4 = 4 ; 5 = 5 ; 6 = 6 ; 7 = 7 ; 8 = 8 ; 9 = 9 ; 10 = 10 ; 11 = 11 ; 12 = 12	parent	saiq01	ccf_sai_p_soc_nmonth
psqi01-psqip6a_3	-0.163622	0.0461629	149	216-263	5. During the past month, how often have you had trouble sleeping because you:(c) Have to get up to use the bathroom: 1= Not during the past month ; 2= Less than once a week ; 3= Once or twice a week ; 4= Three or more times a week	5. During the past month, how often have you had trouble sleeping because you:(c) Have to get up to use the bathroom: 1= Not during the past month ; 2= Less than once a week ; 3= Once or twice a week ; 4= Three or more times a week	teen	psqi01	psqip6a_3
asr01-externalizing_problems_total	-0.166539	0.0423617	149	216-263	External Syndrome Score	External Syndrome Score	teen/child	asr01	externalizing_problems_total
psqi01-psqip6b_1	-0.167191	0.0415498	149	216-263	5. During the past month, how often have you had trouble sleeping because you:(f) Feel too cold: 1= Not during the past month ; 2= Less than once a week ; 3= Once or twice a week ; 4= Three or more times a week	5. During the past month, how often have you had trouble sleeping because you:(f) Feel too cold: 1= Not during the past month ; 2= Less than once a week ; 3= Once or twice a week ; 4= Three or more times a week	teen	psqi01	psqip6b_1
tlbx_motor01-Dexterity-nih_tlbx_nondomsc	-0.174256	0.0002068	449	97-263	9-Hole Pegboard Dexterity Test Non-Dominant Score	9-Hole Pegboard Dexterity Test Non-Dominant Score	NIH Toolbox Ipad App	tlbx_motor01	nih_tlbx_nondomsc
screentime01-self-screentime4_wkdy_y	-0.175253	1.10221e-05	622	97-263	1. On a typical weekday, how many hours do you: Text on a cell phone, tablet, or computer (e.g. GChat, Whatsapp, etc.)? 0 = None ; 0.25 = < 30 minutes ; 0.5 = 30 minutes ; 1 = 1 hour ; 2 = 2 hours ; 3 = 3 hours ; 4 = 4+ hours - partial times are rounded down	1. On a typical weekday, how many hours do you: Text on a cell phone, tablet, or computer (e.g. GChat, Whatsapp, etc.)? 0 = None ; 0.25 = < 30 minutes ; 0.5 = 30 minutes ; 1 = 1 hour ; 2 = 2 hours ; 3 = 3 hours ; 4 = 4+ hours - partial times are rounded down	teen/child	screentime01	screentime4_wkdy_y
bisbas01-self-bas_drive	-0.175878	1.00755e-05	623	97-263	BAS Drive: teen/child report	BAS Drive: teen/child report	teen/child	bisbas01	bas_drive
bisbas01-self-bas_rr	-0.191979	1.38504e-06	623	97-263	BAS Reward Responsiveness: child report	BAS Reward Responsiveness: child report	child	bisbas01	bas_rr
screentime01-self-screentime10_wknd_y	-0.192414	1.389e-06	620	97-263	2. On a typical weekend day, how many hours do you: Text on a cell phone, tablet, or computer (GChat, Whatsapp, etc.)? 0 = None ; 0.25 = < 30 minutes ; 0.5 = 30 minutes ; 1 = 1 hour ; 2 = 2 hours ; 3 = 3 hours ; 4 = 4+ hours - partial times are rounded down	2. On a typical weekend day, how many hours do you: Text on a cell phone, tablet, or computer (GChat, Whatsapp, etc.)? 0 = None ; 0.25 = < 30 minutes ; 0.5 = 30 minutes ; 1 = 1 hour ; 2 = 2 hours ; 3 = 3 hours ; 4 = 4+ hours - partial times are rounded down	teen/child	screentime01	screentime10_wknd_y
screentime01-caregiver-screentime1_p	-0.19682	1.5885e-05	474	97-214	1. On a typical WEEKDAY, how much TIME does your child spend on a computer, cellphone, tablet, or other electronic device? Please do NOT include time spent on school related work, but do include watching TV, shows or videos, texting or chatting, playing games, or visiting social networking sites (Facebook, Twitter, Instagram). Hours:	1. On a typical WEEKDAY, how much TIME does your child spend on a computer, cellphone, tablet, or other electronic device? Please do NOT include time spent on school related work, but do include watching TV, shows or videos, texting or chatting, playing games, or visiting social networking sites (Facebook, Twitter, Instagram). Hours:	parent	screentime01	screentime1_p
saiq01-ccf_sai_p_wpolo_tspent	-0.203908	0.00925112	162	97-213	Swimming, Water Polo: During the most active period, about how many minutes per session did your child participate in this activity? 0 = Don't know ; 1 = less than 30 minutes ; 2 = 30 ; 3 = 45 ; 4 = 60 (1 hr) ; 5 = 90 (1.5 hrs) ; 6 = 120 (2 hrs) ; 7 = 150 (2.5 hrs) ; 8 = 180 (3 hrs) ; 9 = greater than 3 hours	Swimming, Water Polo: During the most active period, about how many minutes per session did your child participate in this activity? 0 = Don't know ; 1 = less than 30 minutes ; 2 = 30 ; 3 = 45 ; 4 = 60 (1 hr) ; 5 = 90 (1.5 hrs) ; 6 = 120 (2 hrs) ; 7 = 150 (2.5 hrs) ; 8 = 180 (3 hrs) ; 9 = greater than 3 hours	parent	saiq01	ccf_sai_p_wpolo_tspent
psqi01-psqpi7_2	-0.205791	0.0118072	149	216-263	8. During the past month, how often have you had trouble staying awake while driving, eating meals, or engaging in social activity? 1= Not during the past month ; 2= Less than once a week ; 3= Once or twice a week ; 4= Three or more times a week	8. During the past month, how often have you had trouble staying awake while driving, eating meals, or engaging in social activity? 1= Not during the past month ; 2= Less than once a week ; 3= Once or twice a week ; 4= Three or more times a week	teen	psqi01	psqpi7_2
phenx_su01-fam_mem_injured_aff	-0.222777	0.0182283	112	98-263	2.2. How much did the event affect you? 1=Not at all; 2= A little; 3=Some; 4=A lot; 5=Not applicable; 6=Don't know	2.2. How much did the event affect you? 1=Not at all; 2= A little; 3=Some; 4=A lot; 5=Not applicable; 6=Don't know	teen/child	phenx_su01	fam_mem_injured_aff
asr01-rule_breaking_behavior_total	-0.228034	0.00515769	149	216-263	Rule-Breaking Behavior Syndrome Score	Rule-Breaking Behavior Syndrome Score	teen/child	asr01	rule_breaking_behavior_total
saiq01-ccf_sai_p_wpolo_nmonth	-0.232404	0.00310392	160	97-213	Swimming, Water Polo: During the most active period, about how many months per year did your child participate in this activity? 0 = Don't know ; 1 = 1 ; 2 = 2 ; 3 = 3 ; 4 = 4 ; 5 = 5 ; 6 = 6 ; 7 = 7 ; 8 = 8 ; 9 = 9 ; 10 = 10 ; 11 = 11 ; 12 = 12	Swimming, Water Polo: During the most active period, about how many months per year did your child participate in this activity? 0 = Don't know ; 1 = 1 ; 2 = 2 ; 3 = 3 ; 4 = 4 ; 5 = 5 ; 6 = 6 ; 7 = 7 ; 8 = 8 ; 9 = 9 ; 10 = 10 ; 11 = 11 ; 12 = 12	parent	saiq01	ccf_sai_p_wpolo_nmonth
asr01-antisocial_total	-0.233557	0.00414803	149	216-263	6. Antisocial Personality Problems Total:	6. Antisocial Personality Problems Total:	teen/child	asr01	antisocial_total
